# Supplementary material for: Impacts of COVID-19 lockdowns and stimulus payments on low-income population’s spending in the United States
Source: PubMed Central journal article supplement (PMC8425560; doi:10.1371/journal.pone.0256407), 2021-09-08
Supplement: pone.0256407.s001.pdf [file pone.0256407.s001.pdf]

# Supplementary Material

## Figures

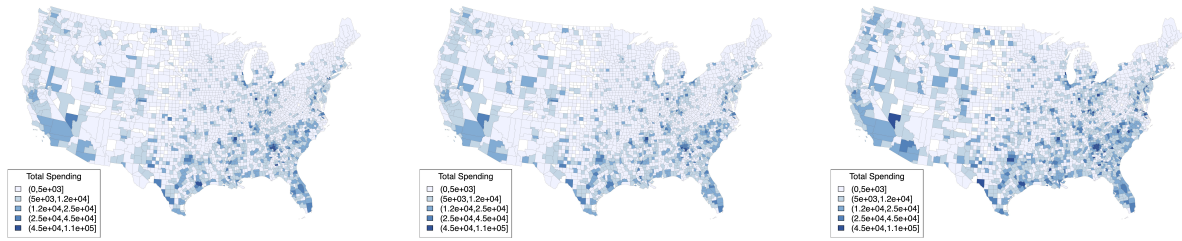

(a) Before Lockdown 2020

(b) After Lockdown 2020

(c) After Stimulus 2020

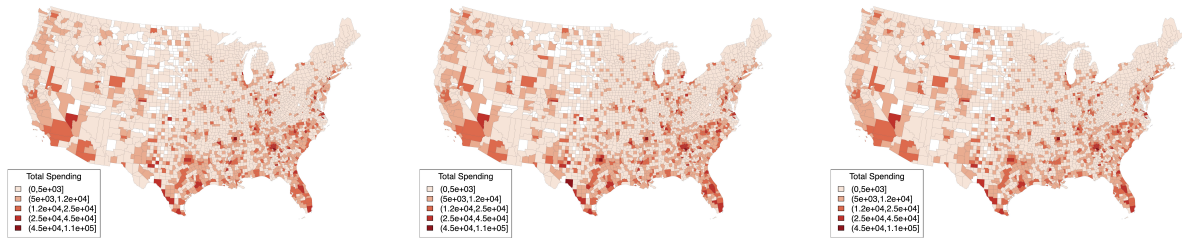

(d) Before Lockdown 2019

(e) After Lockdown 2019

(f) After Stimulus 2019

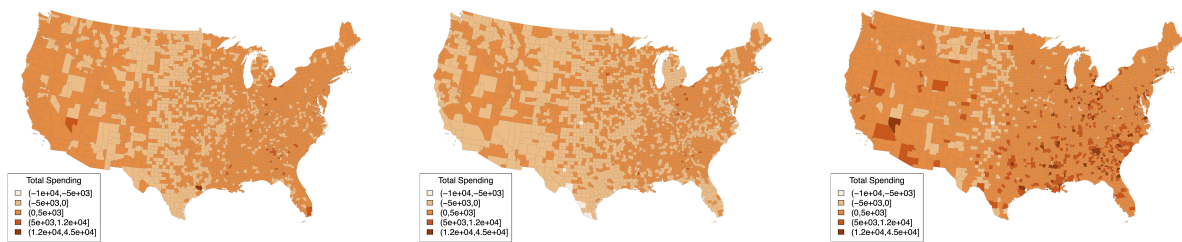

(g) Before Lockdown 2020 - 2019

(h) After Lockdown 2020 - 2019

(i) After Stimulus 2020 - 2019

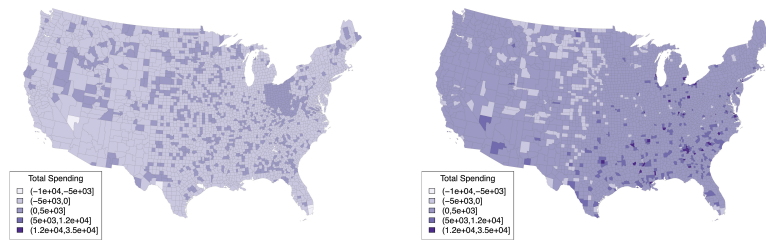

(j) After Lockdown DID

(k) After Stimulus DID

S1 Fig: Spatial distribution of daily average zip code spending over different periods.

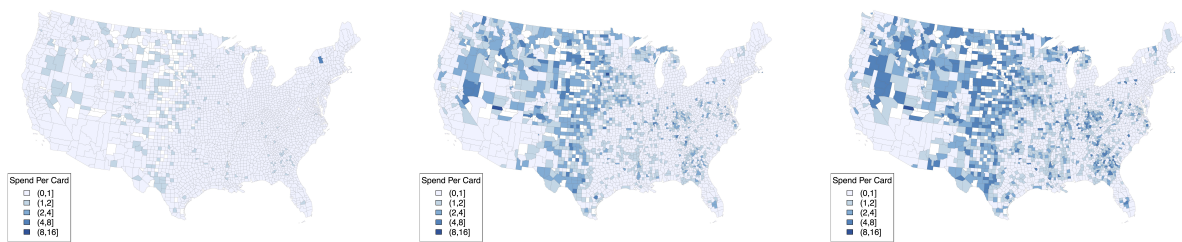

(a) Before Lockdown 2020

(b) After Lockdown 2020

(c) After Stimulus 2020

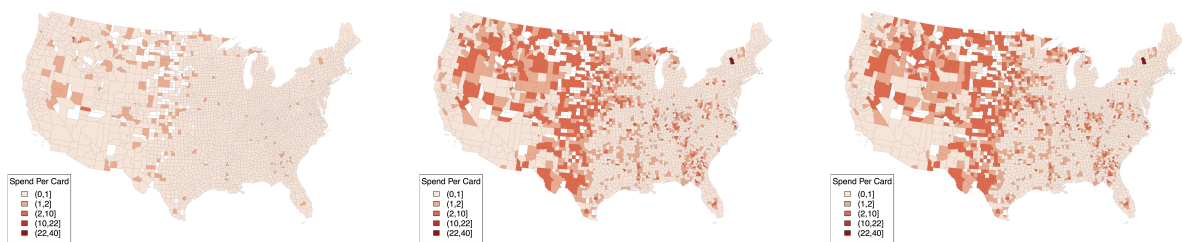

(d) Before Lockdown 2019

(e) After Lockdown 2019

(f) After Stimulus 2019

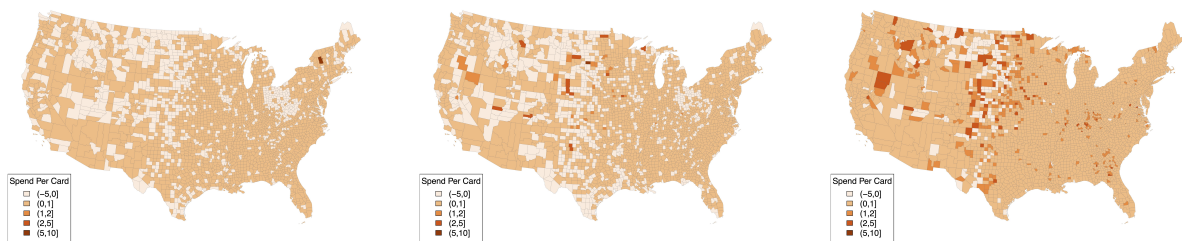

(g) Before Lockdown 2020 - 2019

(h) After Lockdown 2020 - 2019

(i) After Stimulus 2020 - 2019

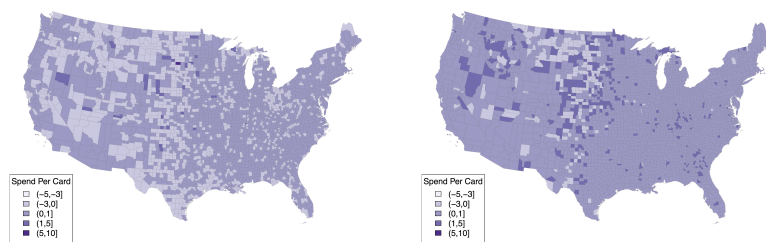

(j) After Lockdown DID

(k) After Stimulus DID

S2 Fig: Spatial distribution of daily average per card spending over different periods.

## Tables

S1 Table: Major Spending Groups and Categories.

| Spending Group           | Category              | Sub-category                                                                     |
|--------------------------|-----------------------|----------------------------------------------------------------------------------|
| Travel                   | airlines              |                                                                                  |
|                          | car rental            |                                                                                  |
|                          | hotels                |                                                                                  |
| Home Activities          | internet              | internet, cable, telecommunication, etc                                          |
|                          | home office           | Computer maintenance, e-repair, office stores, etc                               |
|                          | home improvement      | Glassware, air-condition, furniture, floor-covering, etc                         |
|                          | education             | school tuition, educational services                                             |
|                          | child care            |                                                                                  |
| Health                   | medical services      | physician, dental, opticians, nursing, osteopaths, etc                           |
|                          | liquor & cigar stores | beer, wine, tobacco                                                              |
|                          | drug stores           | pharmacies                                                                       |
| General merchandise      | wholesale clubs       | e.g. Costco                                                                      |
|                          | department stores     | e.g. Macy's                                                                      |
|                          | discount stores       | e.g. dollar tree                                                                 |
| Food                     | restaurants           | catering, restaurant, drinking, fast-food                                        |
|                          | grocery               | grocery store, freezer candy, nuts, dairy, bakery                                |
| Entertainment            | outdoor recreation    | movie, band, orchestra, dance hall, tourist, betting, park, club, aquariums, etc |
|                          | indoor digital        | game, book, movies, music, online gambling                                       |
|                          | indoor non-digital    | toys, books, craft, photography, etc                                             |
| Other non-food Shopping  | used goods            | antique, pawn, etc                                                               |
|                          | cosmetics             | e.g. Sephora                                                                     |
|                          | auto dealers          | car selling/leasing, accessories stores, etc                                     |
|                          | auto                  | auto repair, tire, paint, car wash, towing, etc                                  |
| Finance                  |                       | tax, real estate, charity, political fundraising, employment services, etc       |
| Personal Services        |                       | dryer, dating, funeral, spa, massage, tattoo, shoe repair, etc                   |
| Clothing and Accessories |                       | jewelry, clocks, silverware, clothes, fur, shoe, tailor, etc                     |

## .1 Daily Zip Code Level Spending

S2 Table: Effects of staggered lockdowns and stimulus payments on zip code level spending.

|                                                 | Dollar Change (\$)       |                         |                          | Percentage Change (%) |                       |                       |
|-------------------------------------------------|--------------------------|-------------------------|--------------------------|-----------------------|-----------------------|-----------------------|
|                                                 | All                      | Republican              | Democratic               | All                   | Republican            | Democratic            |
| $\beta : \mathbb{1}\{\geq \text{order\_date}\}$ | -1689.657***<br>(36.548) | -686.725***<br>(25.792) | -2890.987***<br>(71.184) | -19.503***<br>(0.282) | -15.945***<br>(0.412) | -24.182***<br>(0.360) |
| $\gamma : \mathbb{1}\{\geq 04 - 11\}$           | 3409.338***<br>(44.855)  | 2383.852***<br>(35.932) | 5085.928***<br>(100.879) | 39.386***<br>(0.240)  | 41.633***<br>(0.318)  | 35.325***<br>(0.358)  |
| Adjusted R <sup>2</sup>                         | 0.467                    | 0.419                   | 0.482                    | 0.223                 | 0.215                 | 0.240                 |
| N                                               | 2521355                  | 1589995                 | 931360                   | 2521355               | 1589995               | 931360                |

\*\*\* 0.01 \*\*0.05 \* 0.1

Note: The regressions include the zip-month fixed effects. The standard errors shown in the parenthesis are clustered at the zip code level.

S3 Table: Global Moran's I statistical analysis for DID of daily average county and per card spending after lockdown and stimulus payments.

| Title                 | Period         | Moran's Index | Z-value | Results   |
|-----------------------|----------------|---------------|---------|-----------|
| County Spending DID   | after lockdown | 0.019         | 5.202   | clustered |
|                       | after stimulus | 0.115         | 12.813  | clustered |
| Per Card Spending DID | after lockdown | 0.100         | 9.098   | clustered |
|                       | after stimulus | 0.252         | 22.435  | clustered |

## .2 Travel Spending

### Total

S4 Table: Effects of initial lockdown and stimulus payments on zip code level travel spending

|                                       | Dollar Change (\$)     |                        |                         | Percentage Change (%) |                       |                       |
|---------------------------------------|------------------------|------------------------|-------------------------|-----------------------|-----------------------|-----------------------|
|                                       | All                    | Republican             | Democratic              | All                   | Republican            | Democratic            |
| $\beta : \mathbb{1}\{\geq 03 - 19\}$  | -332.649***<br>(5.880) | -177.101***<br>(4.342) | -476.996***<br>(10.272) | -52.151***<br>(0.928) | -45.187***<br>(1.484) | -58.613***<br>(1.139) |
| $\gamma : \mathbb{1}\{\geq 04 - 11\}$ | 179.719***<br>(4.351)  | 124.114***<br>(4.077)  | 228.512***<br>(7.288)   | 31.037***<br>(1.100)  | 38.332***<br>(1.889)  | 24.636***<br>(1.225)  |
| Adjusted R <sup>2</sup>               | 0.224                  | 0.118                  | 0.259                   | 0.144                 | 0.131                 | 0.151                 |
| N                                     | 1245420                | 601982                 | 643438                  | 1245420               | 601982                | 643438                |

\*\*\* 0.01 \*\*0.05 \* 0.1

Note: The regressions include the zip-month fixed effects. The standard errors shown in the parenthesis are clustered at the zip code level.

S5 Table: Effects on travel dollar change across geographic regions

|                                       | Dependent Variable: Dollar Change (\$) |                         |                         |                         |                         |                         |                         |                         |
|---------------------------------------|----------------------------------------|-------------------------|-------------------------|-------------------------|-------------------------|-------------------------|-------------------------|-------------------------|
|                                       | New England                            | Mideast                 | Southeast               | Great Lakes             | Plains                  | Rocky Mountains         | Southwest               | Far West                |
| $\beta : \mathbb{1}\{\geq 03 - 19\}$  | -238.813***<br>(17.775)                | -433.777***<br>(21.401) | -317.248***<br>(10.407) | -367.296***<br>(17.512) | -210.460***<br>(13.673) | -266.089***<br>(19.837) | -297.472***<br>(12.877) | -359.186***<br>(13.842) |
| $\gamma : \mathbb{1}\{\geq 04 - 11\}$ | 127.277***<br>(12.730)                 | 184.067***<br>(13.568)  | 203.001***<br>(7.580)   | 244.026***<br>(13.516)  | 124.936***<br>(10.937)  | 95.401***<br>(21.983)   | 163.951***<br>(11.837)  | 134.610***<br>(9.686)   |
| Adjusted R <sup>2</sup>               | 0.152                                  | 0.248                   | 0.266                   | 0.157                   | 0.118                   | 0.116                   | 0.248                   | 0.181                   |
| N                                     | 60057                                  | 192585                  | 366219                  | 176632                  | 83371                   | 41011                   | 153891                  | 172635                  |

\*\*\* 0.01 \*\*0.05 \* 0.1

Note: The regressions include the zip-month fixed effects. The standard errors shown in the parenthesis are clustered at the zip code level.

S6 Table: Effects on travel percentage change across geographic regions

|                                       | Dependent Variable: Percentage Change (%) |                       |                       |                       |                       |                       |                       |                       |
|---------------------------------------|-------------------------------------------|-----------------------|-----------------------|-----------------------|-----------------------|-----------------------|-----------------------|-----------------------|
|                                       | New England                               | Mideast               | Southeast             | Great Lakes           | Plains                | Rocky Mountains       | Southwest             | Far West              |
| $\beta : \mathbb{1}\{\geq 03 - 19\}$  | -68.551***<br>(5.227)                     | -62.882***<br>(2.422) | -48.942***<br>(1.711) | -55.268***<br>(2.485) | -48.852***<br>(3.990) | -50.949***<br>(5.225) | -38.168***<br>(2.300) | -53.929***<br>(2.280) |
| $\gamma : \mathbb{1}\{\geq 04 - 11\}$ | 28.415***<br>(5.512)                      | 18.480***<br>(2.456)  | 39.435***<br>(2.171)  | 46.036***<br>(2.972)  | 37.778***<br>(4.946)  | 29.837***<br>(6.425)  | 24.246***<br>(2.949)  | 17.585***<br>(2.541)  |
| Adjusted R <sup>2</sup>               | 0.152                                     | 0.158                 | 0.137                 | 0.141                 | 0.139                 | 0.138                 | 0.138                 | 0.141                 |
| N                                     | 60057                                     | 192585                | 366219                | 176632                | 83371                 | 41011                 | 153891                | 172635                |

\*\*\* 0.01 \*\*0.05 \* 0.1

Note: The regressions include the zip-month fixed effects. The standard errors shown in the parenthesis are clustered at the zip code level.

## Airlines

S7 Table: Effects of initial lockdown and stimulus payments on zip code level airlines spending

|                                       | Dollar Change (\$)     |                       |                        | Percentage Change (%) |                        |                       |
|---------------------------------------|------------------------|-----------------------|------------------------|-----------------------|------------------------|-----------------------|
|                                       | All                    | Republican            | Democratic             | All                   | Republican             | Democratic            |
| $\beta : \mathbb{1}\{\geq 03 - 19\}$  | -154.360***<br>(7.332) | -90.181***<br>(9.397) | -171.610***<br>(8.838) | -93.717***<br>(4.526) | -82.489***<br>(11.634) | -96.734***<br>(4.813) |
| $\gamma : \mathbb{1}\{\geq 04 - 11\}$ | 68.360***<br>(8.919)   | 58.402***<br>(20.041) | 70.449***<br>(9.932)   | 53.313***<br>(7.451)  | 68.883***<br>(20.922)  | 50.046***<br>(7.879)  |
| Adjusted R <sup>2</sup>               | 0.181                  | 0.210                 | 0.176                  | 0.189                 | 0.232                  | 0.173                 |
| N                                     | 106376                 | 23980                 | 82396                  | 106376                | 23980                  | 82396                 |

\*\*\* 0.01 \*\*0.05 \* 0.1

Note: The regressions include the zip-month fixed effects. The standard errors shown in the parenthesis are clustered at the zip code level.

S8 Table: Effects on airlines dollar change across geographic regions

|                                       | Dependent Variable: Dollar Change (\$) |                         |                         |                         |                         |                         |                         |                         |
|---------------------------------------|----------------------------------------|-------------------------|-------------------------|-------------------------|-------------------------|-------------------------|-------------------------|-------------------------|
|                                       | New England                            | Mideast                 | Southeast               | Great Lakes             | Plains                  | Rocky Mountains         | Southwest               | Far West                |
| $\beta : \mathbb{1}\{\geq 03 - 19\}$  | -106.142***<br>(30.961)                | -192.843***<br>(20.008) | -145.844***<br>(13.574) | -248.759***<br>(27.966) | -143.143***<br>(27.540) | -124.428***<br>(22.361) | -127.092***<br>(13.821) | -105.301***<br>(14.230) |
| $\gamma : \mathbb{1}\{\geq 04 - 11\}$ | 3.541<br>(46.159)                      | 97.818***<br>(28.041)   | 71.356***<br>(17.890)   | 103.259***<br>(22.852)  | 2.806<br>(48.160)       | 37.079<br>(48.145)      | 38.752*<br>(21.362)     | 60.039***<br>(17.035)   |
| Adjusted R <sup>2</sup>               | 0.198                                  | 0.200                   | 0.169                   | 0.149                   | 0.216                   | 0.153                   | 0.217                   | 0.157                   |
| N                                     | 3158                                   | 15987                   | 26837                   | 13955                   | 4276                    | 4276                    | 16888                   | 21074                   |

\*\*\* 0.01 \*\*0.05 \* 0.1

Note: The regressions include the zip-month fixed effects. The standard errors shown in the parenthesis are clustered at the zip code level.

S9 Table: Effects on airlines percentage change across geographic regions

|                                       | Dependent Variable: Percentage Change (%) |                         |                       |                         |                        |                         |                        |                        |
|---------------------------------------|-------------------------------------------|-------------------------|-----------------------|-------------------------|------------------------|-------------------------|------------------------|------------------------|
|                                       | New England                               | Mideast                 | Southeast             | Great Lakes             | Plains                 | Rocky Mountains         | Southwest              | Far West               |
| $\beta : \mathbb{1}\{\geq 03 - 19\}$  | -107.477***<br>(23.551)                   | -107.520***<br>(10.075) | -88.736***<br>(8.632) | -118.338***<br>(10.190) | -88.262***<br>(23.634) | -118.630***<br>(23.128) | -81.075***<br>(13.677) | -75.743***<br>(10.816) |
| $\gamma : \mathbb{1}\{\geq 04 - 11\}$ | 31.691<br>(38.138)                        | 91.739***<br>(17.667)   | 45.747***<br>(14.221) | 64.763***<br>(15.923)   | 30.777<br>(39.309)     | 9.161<br>(38.597)       | 29.511<br>(24.938)     | 56.978***<br>(16.219)  |
| Adjusted R <sup>2</sup>               | 0.240                                     | 0.175                   | 0.184                 | 0.190                   | 0.244                  | 0.205                   | 0.178                  | 0.184                  |
| N                                     | 3158                                      | 15987                   | 26837                 | 13955                   | 4276                   | 4276                    | 16888                  | 21074                  |

\*\*\* 0.01 \*\*0.05 \* 0.1

Note: The regressions include the zip-month fixed effects. The standard errors shown in the parenthesis are clustered at the zip code level.

## Car Rental

S10 Table: Effects of initial lockdown and stimulus payments on zip code level car rental spending

|                                       | Dollar Change (\$)    |                      |                       | Percentage Change (%) |                        |                       |
|---------------------------------------|-----------------------|----------------------|-----------------------|-----------------------|------------------------|-----------------------|
|                                       | All                   | Republican           | Democratic            | All                   | Republican             | Democratic            |
| $\beta : \mathbb{1}\{\geq 03 - 19\}$  | -12.969***<br>(2.350) | 8.961**<br>(4.360)   | -19.577***<br>(2.746) | 3.076<br>(6.896)      | 102.836***<br>(16.688) | -26.985***<br>(7.373) |
| $\gamma : \mathbb{1}\{\geq 04 - 11\}$ | 29.436***<br>(3.232)  | 21.719***<br>(6.459) | 31.175***<br>(3.682)  | 86.714***<br>(10.245) | 55.473*<br>(29.777)    | 93.754***<br>(10.609) |
| Adjusted R <sup>2</sup>               | 0.096                 | 0.133                | 0.086                 | 0.137                 | 0.172                  | 0.122                 |
| N                                     | 355734                | 84199                | 271535                | 355734                | 84199                  | 271535                |

\*\*\* 0.01 \*\*0.05 \* 0.1

Note: The regressions include the zip-month fixed effects. The standard errors shown in the parenthesis are clustered at the zip code level.

S11 Table: Effects on car rental dollar change across geographic regions

|                                       | Dependent Variable: Dollar Change (\$) |                       |                      |                       |                    |                    |                   |                      |
|---------------------------------------|----------------------------------------|-----------------------|----------------------|-----------------------|--------------------|--------------------|-------------------|----------------------|
|                                       | New England                            | Mideast               | Southeast            | Great Lakes           | Plains             | Rocky Mountains    | Southwest         | Far West             |
| $\beta : \mathbb{1}\{\geq 03 - 19\}$  | -6.280<br>(10.382)                     | -25.978***<br>(5.874) | -10.139**<br>(5.111) | -31.340***<br>(7.781) | 14.359<br>(9.034)  | -2.728<br>(11.777) | -4.477<br>(5.842) | -9.965**<br>(4.378)  |
| $\gamma : \mathbb{1}\{\geq 04 - 11\}$ | 42.985**<br>(17.065)                   | 32.262***<br>(7.747)  | 40.944***<br>(6.954) | 53.832***<br>(10.135) | 12.892<br>(13.264) | -5.882<br>(15.386) | -0.799<br>(7.716) | 20.131***<br>(6.114) |
| Adjusted R <sup>2</sup>               | 0.115                                  | 0.103                 | 0.092                | 0.109                 | 0.111              | 0.104              | 0.098             | 0.079                |
| N                                     | 16161                                  | 58713                 | 86254                | 44501                 | 15993              | 11360              | 49376             | 73400                |

\*\*\* 0.01 \*\*0.05 \* 0.1

Note: The regressions include the zip-month fixed effects. The standard errors shown in the parenthesis are clustered at the zip code level.

S12 Table: Effects on car rental percentage change across geographic regions

|                                       | Dependent Variable: Percentage Change (%) |                        |                       |                        |                     |                     |                    |                       |
|---------------------------------------|-------------------------------------------|------------------------|-----------------------|------------------------|---------------------|---------------------|--------------------|-----------------------|
|                                       | New England                               | Mideast                | Southeast             | Great Lakes            | Plains              | Rocky Mountains     | Southwest          | Far West              |
| $\beta : \mathbb{1}\{\geq 03 - 19\}$  | -3.849<br>(34.961)                        | -18.667<br>(15.674)    | 45.852***<br>(13.972) | 11.194<br>(20.282)     | 45.469<br>(35.041)  | -29.520<br>(43.788) | -0.342<br>(16.920) | -39.811**<br>(15.716) |
| $\gamma : \mathbb{1}\{\geq 04 - 11\}$ | 190.467***<br>(58.471)                    | 124.968***<br>(21.055) | 72.370***<br>(22.286) | 131.194***<br>(28.974) | 96.326*<br>(52.861) | -6.235<br>(87.337)  | 11.393<br>(26.660) | 70.639***<br>(21.489) |
| Adjusted R <sup>2</sup>               | 0.148                                     | 0.144                  | 0.142                 | 0.149                  | 0.155               | 0.131               | 0.129              | 0.113                 |
| N                                     | 16161                                     | 58713                  | 86254                 | 44501                  | 15993               | 11360               | 49376              | 73400                 |

\*\*\* 0.01 \*\*0.05 \* 0.1

Note: The regressions include the zip-month fixed effects. The standard errors shown in the parenthesis are clustered at the zip code level.

## Hotels

S13 Table: Effects of initial lockdown and stimulus payments on zip code level hotels spending

|                                       | Dollar Change (\$)     |                       |                        | Percentage Change (%) |                       |                       |
|---------------------------------------|------------------------|-----------------------|------------------------|-----------------------|-----------------------|-----------------------|
|                                       | All                    | Republican            | Democratic             | All                   | Republican            | Democratic            |
| $\beta : \mathbb{1}\{\geq 03 - 19\}$  | -108.018***<br>(3.452) | -76.889***<br>(4.109) | -130.210***<br>(5.089) | -33.112***<br>(1.895) | -29.639***<br>(3.009) | -35.588***<br>(2.435) |
| $\gamma : \mathbb{1}\{\geq 04 - 11\}$ | 81.223***<br>(4.048)   | 58.514***<br>(5.024)  | 95.869***<br>(5.796)   | 32.907***<br>(2.539)  | 29.124***<br>(4.199)  | 35.347***<br>(3.180)  |
| Adjusted R <sup>2</sup>               | 0.200                  | 0.109                 | 0.225                  | 0.125                 | 0.135                 | 0.118                 |
| N                                     | 431098                 | 177674                | 253424                 | 431098                | 177674                | 253424                |

\*\*\* 0.01 \*\*0.05 \* 0.1

Note: The regressions include the zip-month fixed effects. The standard errors shown in the parenthesis are clustered at the zip code level.

S14 Table: Effects on hotels dollar change across geographic regions

|                                       | Dependent Variable: Dollar Change (\$) |                         |                        |                        |                        |                        |                       |                        |
|---------------------------------------|----------------------------------------|-------------------------|------------------------|------------------------|------------------------|------------------------|-----------------------|------------------------|
|                                       | New England                            | Mideast                 | Southeast              | Great Lakes            | Plains                 | Rocky Mountains        | Southwest             | Far West               |
| $\beta : \mathbb{1}\{\geq 03 - 19\}$  | -66.959***<br>(14.379)                 | -117.128***<br>(13.180) | -130.423***<br>(6.065) | -130.567***<br>(9.804) | -62.155***<br>(10.507) | -64.311***<br>(14.223) | -74.074***<br>(8.175) | -105.558***<br>(8.462) |
| $\gamma : \mathbb{1}\{\geq 04 - 11\}$ | 30.597*<br>(17.148)                    | 68.623***<br>(11.745)   | 96.476***<br>(7.163)   | 131.934***<br>(11.750) | 63.773***<br>(14.878)  | 13.381<br>(17.788)     | 47.280***<br>(10.588) | 77.431***<br>(9.797)   |
| Adjusted R <sup>2</sup>               | 0.153                                  | 0.123                   | 0.288                  | 0.102                  | 0.106                  | 0.089                  | 0.204                 | 0.106                  |
| N                                     | 10550                                  | 45461                   | 142764                 | 53441                  | 23625                  | 16107                  | 72361                 | 66869                  |

\*\*\* 0.01 \*\*0.05 \* 0.1

Note: The regressions include the zip-month fixed effects. The standard errors shown in the parenthesis are clustered at the zip code level.

S15 Table: Effects on hotels percentage change across geographic regions

|                                       | Dependent Variable: Percentage Change (%) |                       |                       |                       |                       |                        |                       |                       |
|---------------------------------------|-------------------------------------------|-----------------------|-----------------------|-----------------------|-----------------------|------------------------|-----------------------|-----------------------|
|                                       | New England                               | Mideast               | Southeast             | Great Lakes           | Plains                | Rocky Mountains        | Southwest             | Far West              |
| $\beta : \mathbb{1}\{\geq 03 - 19\}$  | -41.326***<br>(12.599)                    | -34.136***<br>(6.463) | -36.692***<br>(3.096) | -41.688***<br>(5.084) | -24.831***<br>(8.414) | -42.015***<br>(10.565) | -18.852***<br>(4.661) | -33.483***<br>(5.046) |
| $\gamma : \mathbb{1}\{\geq 04 - 11\}$ | 31.226<br>(18.962)                        | 25.844***<br>(8.022)  | 37.582***<br>(4.073)  | 48.693***<br>(6.921)  | 13.976<br>(13.417)    | 12.606<br>(13.783)     | 24.526***<br>(6.487)  | 33.740***<br>(6.496)  |
| Adjusted R <sup>2</sup>               | 0.154                                     | 0.134                 | 0.124                 | 0.133                 | 0.133                 | 0.116                  | 0.121                 | 0.113                 |
| N                                     | 10550                                     | 45461                 | 142764                | 53441                 | 23625                 | 16107                  | 72361                 | 66869                 |

\*\*\* 0.01 \*\*0.05 \* 0.1

Note: The regressions include the zip-month fixed effects. The standard errors shown in the parenthesis are clustered at the zip code level.



### .3 Home Activities Spending

#### Total

S16 Table: Effects of initial lockdown and stimulus payments on zip code level home activity spending

|                                       | Dollar Change (\$)     |                        |                         | Percentage Change (%) |                       |                       |
|---------------------------------------|------------------------|------------------------|-------------------------|-----------------------|-----------------------|-----------------------|
|                                       | All                    | Republican             | Democratic              | All                   | Republican            | Democratic            |
| $\beta : \mathbb{1}\{\geq 03 - 19\}$  | -240.075***<br>(7.048) | -132.213***<br>(4.992) | -405.968***<br>(15.954) | -17.094***<br>(0.833) | -16.663***<br>(1.141) | -17.757***<br>(1.176) |
| $\gamma : \mathbb{1}\{\geq 04 - 11\}$ | 870.072***<br>(13.858) | 550.086***<br>(9.873)  | 1347.563***<br>(30.414) | 86.363***<br>(1.127)  | 88.588***<br>(1.549)  | 83.042***<br>(1.595)  |
| Adjusted R <sup>2</sup>               | 0.431                  | 0.354                  | 0.443                   | 0.125                 | 0.118                 | 0.137                 |
| N                                     | 1934896                | 1167328                | 767568                  | 1934896               | 1167328               | 767568                |

\*\*\* 0.01 \*\*0.05 \* 0.1

Note: The regressions include the zip-month fixed effects. The standard errors shown in the parenthesis are clustered at the zip code level.

S17 Table: Effects on home activity dollar change across geographic regions

|                                       | Dependent Variable: Dollar Change (\$) |                         |                         |                         |                        |                        |                         |                         |
|---------------------------------------|----------------------------------------|-------------------------|-------------------------|-------------------------|------------------------|------------------------|-------------------------|-------------------------|
|                                       | New England                            | Mideast                 | Southeast               | Great Lakes             | Plains                 | Rocky Mountains        | Southwest               | Far West                |
| $\beta : \mathbb{1}\{\geq 03 - 19\}$  | -110.479***<br>(14.079)                | -273.100***<br>(15.081) | -336.054***<br>(18.240) | -231.337***<br>(14.088) | -87.482***<br>(10.692) | -65.350***<br>(13.582) | -238.996***<br>(19.216) | -168.682***<br>(11.135) |
| $\gamma : \mathbb{1}\{\geq 04 - 11\}$ | 417.723***<br>(29.489)                 | 746.195***<br>(32.976)  | 1026.457***<br>(28.947) | 1047.871***<br>(44.680) | 619.765***<br>(36.419) | 507.146***<br>(31.785) | 1105.759***<br>(35.981) | 636.509***<br>(26.057)  |
| Adjusted R <sup>2</sup>               | 0.462                                  | 0.436                   | 0.401                   | 0.478                   | 0.417                  | 0.247                  | 0.516                   | 0.347                   |
| N                                     | 94929                                  | 277303                  | 590000                  | 307091                  | 169256                 | 61093                  | 224696                  | 212646                  |

\*\*\* 0.01 \*\*0.05 \* 0.1

Note: The regressions include the zip-month fixed effects. The standard errors shown in the parenthesis are clustered at the zip code level.

S18 Table: Effects on home activity percentage change across geographic regions

|                                       | Dependent Variable: Percentage Change (%) |                       |                       |                       |                      |                      |                       |                       |
|---------------------------------------|-------------------------------------------|-----------------------|-----------------------|-----------------------|----------------------|----------------------|-----------------------|-----------------------|
|                                       | New England                               | Mideast               | Southeast             | Great Lakes           | Plains               | Rocky Mountains      | Southwest             | Far West              |
| $\beta : \mathbb{1}\{\geq 03 - 19\}$  | -8.703*<br>(4.675)                        | -22.041***<br>(2.345) | -23.847***<br>(1.470) | -14.408***<br>(2.215) | -5.862*<br>(3.022)   | -5.351<br>(4.564)    | -14.528***<br>(1.951) | -15.075***<br>(2.306) |
| $\gamma : \mathbb{1}\{\geq 04 - 11\}$ | 79.605***<br>(5.658)                      | 74.309***<br>(3.013)  | 98.406***<br>(1.990)  | 106.246***<br>(3.007) | 83.131***<br>(4.142) | 60.663***<br>(6.724) | 76.344***<br>(2.806)  | 63.829***<br>(2.982)  |
| Adjusted R <sup>2</sup>               | 0.112                                     | 0.119                 | 0.122                 | 0.123                 | 0.117                | 0.126                | 0.138                 | 0.123                 |
| N                                     | 94929                                     | 277303                | 590000                | 307091                | 169256               | 61093                | 224696                | 212646                |

\*\*\* 0.01 \*\*0.05 \* 0.1

Note: The regressions include the zip-month fixed effects. The standard errors shown in the parenthesis are clustered at the zip code level.

## Internet, cable and telecommunication

S19 Table: Effects of initial lockdown and stimulus payments on zip code level Internet, cable and telecommunication spending

|                                       | Dollar Change (\$)     |                        |                         | Percentage Change (%) |                       |                       |
|---------------------------------------|------------------------|------------------------|-------------------------|-----------------------|-----------------------|-----------------------|
|                                       | All                    | Republican             | Democratic              | All                   | Republican            | Democratic            |
| $\beta : \mathbb{1}\{\geq 03 - 19\}$  | -233.927***<br>(7.179) | -129.202***<br>(5.193) | -384.997***<br>(15.663) | -19.839***<br>(0.810) | -19.633***<br>(1.113) | -20.136***<br>(1.157) |
| $\gamma : \mathbb{1}\{\geq 04 - 11\}$ | 780.411***<br>(13.117) | 494.647***<br>(9.316)  | 1181.571***<br>(27.992) | 84.121***<br>(1.104)  | 83.867***<br>(1.517)  | 84.478***<br>(1.582)  |
| Adjusted R <sup>2</sup>               | 0.427                  | 0.361                  | 0.433                   | 0.118                 | 0.112                 | 0.129                 |
| N                                     | 1722910                | 1014795                | 708115                  | 1722910               | 1014795               | 708115                |

\*\*\* 0.01 \*\*0.05 \* 0.1

Note: The regressions include the zip-month fixed effects. The standard errors shown in the parenthesis are clustered at the zip code level.

S20 Table: Effects on Internet, cable and telecommunication dollar change across geographic regions

|                                       | Dependent Variable: Dollar Change (\$) |                         |                         |                         |                        |                        |                         |                         |
|---------------------------------------|----------------------------------------|-------------------------|-------------------------|-------------------------|------------------------|------------------------|-------------------------|-------------------------|
|                                       | New England                            | Mideast                 | Southeast               | Great Lakes             | Plains                 | Rocky Mountains        | Southwest               | Far West                |
| $\beta : \mathbb{1}\{\geq 03 - 19\}$  | -117.970***<br>(15.092)                | -267.809***<br>(15.171) | -324.799***<br>(18.949) | -239.295***<br>(14.679) | -94.391***<br>(11.325) | -55.812***<br>(13.359) | -200.515***<br>(12.990) | -161.638***<br>(10.563) |
| $\gamma : \mathbb{1}\{\geq 04 - 11\}$ | 366.692***<br>(27.443)                 | 660.950***<br>(29.997)  | 923.030***<br>(27.755)  | 968.222***<br>(42.387)  | 564.812***<br>(35.400) | 422.227***<br>(28.209) | 965.348***<br>(31.970)  | 531.624***<br>(23.455)  |
| Adjusted R <sup>2</sup>               | 0.461                                  | 0.433                   | 0.404                   | 0.492                   | 0.426                  | 0.247                  | 0.461                   | 0.348                   |
| N                                     | 77650                                  | 239070                  | 541197                  | 266925                  | 142957                 | 53858                  | 207485                  | 195483                  |

\*\*\* 0.01 \*\*0.05 \* 0.1

Note: The regressions include the zip-month fixed effects. The standard errors shown in the parenthesis are clustered at the zip code level.

S21 Table: Effects on Internet, cable and telecommunication percentage change across geographic regions

|                                       | Dependent Variable: Percentage Change (%) |                       |                       |                       |                       |                      |                       |                       |
|---------------------------------------|-------------------------------------------|-----------------------|-----------------------|-----------------------|-----------------------|----------------------|-----------------------|-----------------------|
|                                       | New England                               | Mideast               | Southeast             | Great Lakes           | Plains                | Rocky Mountains      | Southwest             | Far West              |
| $\beta : \mathbb{1}\{\geq 03 - 19\}$  | -10.105**<br>(4.519)                      | -22.812***<br>(2.316) | -25.822***<br>(1.409) | -18.387***<br>(2.183) | -10.409***<br>(2.960) | -6.676<br>(4.956)    | -18.292***<br>(1.900) | -17.601***<br>(2.290) |
| $\gamma : \mathbb{1}\{\geq 04 - 11\}$ | 76.993***<br>(5.876)                      | 68.075***<br>(2.952)  | 96.735***<br>(1.944)  | 104.501***<br>(2.920) | 78.868***<br>(3.978)  | 56.585***<br>(6.603) | 79.629***<br>(2.771)  | 61.402***<br>(3.008)  |
| Adjusted R <sup>2</sup>               | 0.113                                     | 0.117                 | 0.115                 | 0.117                 | 0.112                 | 0.111                | 0.128                 | 0.107                 |
| N                                     | 77650                                     | 239070                | 541197                | 266925                | 142957                | 53858                | 207485                | 195483                |

\*\*\* 0.01 \*\*0.05 \* 0.1

Note: The regressions include the zip-month fixed effects. The standard errors shown in the parenthesis are clustered at the zip code level.

## Home Improvement

S22 Table: Effects of initial lockdown and stimulus payments on zip code level home improvement spending

|                                       | Dollar Change (\$)    |                       |                       | Percentage Change (%) |                       |                       |
|---------------------------------------|-----------------------|-----------------------|-----------------------|-----------------------|-----------------------|-----------------------|
|                                       | All                   | Republican            | Democratic            | All                   | Republican            | Democratic            |
| $\beta : \mathbb{1}\{\geq 03 - 19\}$  | -7.635***<br>(1.680)  | -1.894<br>(1.650)     | -15.085***<br>(3.211) | -3.227**<br>(1.350)   | -0.863<br>(1.871)     | -6.296***<br>(1.931)  |
| $\gamma : \mathbb{1}\{\geq 04 - 11\}$ | 184.652***<br>(3.111) | 123.582***<br>(2.641) | 261.618***<br>(6.056) | 110.444***<br>(1.862) | 112.940***<br>(2.568) | 107.298***<br>(2.691) |
| Adjusted R <sup>2</sup>               | 0.164                 | 0.113                 | 0.186                 | 0.121                 | 0.122                 | 0.118                 |
| N                                     | 1464943               | 824003                | 640940                | 1464943               | 824003                | 640940                |

\*\*\* 0.01 \*\*0.05 \* 0.1

Note: The regressions include the zip-month fixed effects. The standard errors shown in the parenthesis are clustered at the zip code level.

S23 Table: Effects on home improvement dollar change across geographic regions

|                                       | Dependent Variable: Dollar Change (\$) |                       |                       |                        |                       |                        |                       |                       |
|---------------------------------------|----------------------------------------|-----------------------|-----------------------|------------------------|-----------------------|------------------------|-----------------------|-----------------------|
|                                       | New England                            | Mideast               | Southeast             | Great Lakes            | Plains                | Rocky Mountains        | Southwest             | Far West              |
| $\beta : \mathbb{1}\{\geq 03 - 19\}$  | -2.354<br>(6.222)                      | -29.281***<br>(4.708) | -8.337***<br>(2.746)  | -8.327*<br>(4.663)     | 7.352<br>(4.598)      | -2.002<br>(7.575)      | -0.986<br>(6.302)     | -1.619<br>(4.189)     |
| $\gamma : \mathbb{1}\{\geq 04 - 11\}$ | 126.997***<br>(10.338)                 | 192.820***<br>(9.448) | 178.781***<br>(5.195) | 235.400***<br>(10.557) | 163.429***<br>(9.018) | 141.030***<br>(10.853) | 220.459***<br>(8.558) | 139.434***<br>(6.672) |
| Adjusted R <sup>2</sup>               | 0.172                                  | 0.160                 | 0.148                 | 0.143                  | 0.131                 | 0.091                  | 0.256                 | 0.123                 |
| N                                     | 64344                                  | 201589                | 449575                | 223172                 | 117279                | 46382                  | 185175                | 178809                |

\*\*\* 0.01 \*\*0.05 \* 0.1

Note: The regressions include the zip-month fixed effects. The standard errors shown in the parenthesis are clustered at the zip code level.

S24 Table: Effects on home improvement percentage change across geographic regions

|                                       | Dependent Variable: Percentage Change (%) |                       |                       |                       |                       |                       |                      |                      |
|---------------------------------------|-------------------------------------------|-----------------------|-----------------------|-----------------------|-----------------------|-----------------------|----------------------|----------------------|
|                                       | New England                               | Mideast               | Southeast             | Great Lakes           | Plains                | Rocky Mountains       | Southwest            | Far West             |
| $\beta : \mathbb{1}\{\geq 03 - 19\}$  | -10.748<br>(7.100)                        | -12.069***<br>(3.773) | -5.540**<br>(2.442)   | 3.249<br>(3.667)      | 8.373*<br>(4.856)     | -4.031<br>(7.178)     | -2.734<br>(3.283)    | -0.621<br>(3.792)    |
| $\gamma : \mathbb{1}\{\geq 04 - 11\}$ | 99.472***<br>(9.710)                      | 108.000***<br>(4.857) | 110.216***<br>(3.272) | 145.284***<br>(5.105) | 130.471***<br>(7.116) | 107.717***<br>(9.628) | 94.980***<br>(4.902) | 77.579***<br>(5.104) |
| Adjusted R <sup>2</sup>               | 0.127                                     | 0.122                 | 0.113                 | 0.127                 | 0.128                 | 0.114                 | 0.122                | 0.111                |
| N                                     | 64344                                     | 201589                | 449575                | 223172                | 117279                | 46382                 | 185175               | 178809               |

\*\*\* 0.01 \*\*0.05 \* 0.1

Note: The regressions include the zip-month fixed effects. The standard errors shown in the parenthesis are clustered at the zip code level.

## Home Office

S25 Table: Effects of initial lockdown and stimulus payments on zip code level home office spending

|                                       | Dollar Change (\$)   |                      |                      | Percentage Change (%)  |                        |                        |
|---------------------------------------|----------------------|----------------------|----------------------|------------------------|------------------------|------------------------|
|                                       | All                  | Republican           | Democratic           | All                    | Republican             | Democratic             |
| $\beta : \mathbb{1}\{\geq 03 - 19\}$  | 5.592***<br>(1.458)  | 7.199***<br>(2.227)  | 4.792**<br>(1.881)   | 31.127***<br>(11.011)  | 46.111**<br>(19.160)   | 23.670*<br>(13.445)    |
| $\gamma : \mathbb{1}\{\geq 04 - 11\}$ | 23.172***<br>(1.577) | 20.736***<br>(2.466) | 24.291***<br>(2.001) | 133.344***<br>(14.203) | 136.980***<br>(24.847) | 131.672***<br>(17.305) |
| Adjusted R <sup>2</sup>               | 0.174                | 0.174                | 0.174                | 0.165                  | 0.189                  | 0.153                  |
| N                                     | 132951               | 46030                | 86921                | 132951                 | 46030                  | 86921                  |

\*\*\* 0.01 \*\*0.05 \* 0.1

Note: The regressions include the zip-month fixed effects. The standard errors shown in the parenthesis are clustered at the zip code level.

S26 Table: Effects on home office dollar change across geographic regions

|                                       | Dependent Variable: Dollar Change (\$) |                      |                      |                      |                      |                   |                      |                      |
|---------------------------------------|----------------------------------------|----------------------|----------------------|----------------------|----------------------|-------------------|----------------------|----------------------|
|                                       | New England                            | Mideast              | Southeast            | Great Lakes          | Plains               | Rocky Mountains   | Southwest            | Far West             |
| $\beta : \mathbb{1}\{\geq 03 - 19\}$  | 0.219<br>(4.268)                       | 6.990*<br>(3.621)    | 4.541*<br>(2.759)    | -2.861<br>(5.305)    | 23.516***<br>(7.512) | 10.331<br>(6.336) | 7.149**<br>(2.785)   | 5.611<br>(4.082)     |
| $\gamma : \mathbb{1}\{\geq 04 - 11\}$ | 18.026***<br>(5.915)                   | 22.564***<br>(4.056) | 27.394***<br>(3.097) | 20.978***<br>(3.794) | 24.279***<br>(9.196) | 15.993<br>(9.884) | 23.709***<br>(3.841) | 17.892***<br>(3.420) |
| Adjusted R <sup>2</sup>               | 0.229                                  | 0.142                | 0.147                | 0.210                | 0.212                | 0.228             | 0.195                | 0.213                |
| N                                     | 4368                                   | 18885                | 41951                | 13730                | 5938                 | 3447              | 24901                | 19752                |

\*\*\* 0.01 \*\*0.05 \* 0.1

Note: The regressions include the zip-month fixed effects. The standard errors shown in the parenthesis are clustered at the zip code level.

S27 Table: Effects on home office percentage change across geographic regions

|                                       | Dependent Variable: Percentage Change (%) |                        |                        |                        |                    |                    |                        |                        |
|---------------------------------------|-------------------------------------------|------------------------|------------------------|------------------------|--------------------|--------------------|------------------------|------------------------|
|                                       | New England                               | Mideast                | Southeast              | Great Lakes            | Plains             | Rocky Mountains    | Southwest              | Far West               |
| $\beta : \mathbb{1}\{\geq 03 - 19\}$  | -87.450<br>(70.257)                       | 29.618<br>(27.751)     | 29.778<br>(20.743)     | 21.545<br>(35.842)     | 43.529<br>(48.114) | 13.853<br>(64.531) | 46.024*<br>(23.568)    | 47.912*<br>(27.301)    |
| $\gamma : \mathbb{1}\{\geq 04 - 11\}$ | 88.527<br>(62.961)                        | 138.524***<br>(33.628) | 154.154***<br>(24.614) | 170.734***<br>(44.779) | 51.199<br>(76.271) | 80.950<br>(86.644) | 123.214***<br>(35.546) | 113.026***<br>(39.109) |
| Adjusted R <sup>2</sup>               | 0.197                                     | 0.150                  | 0.156                  | 0.191                  | 0.196              | 0.203              | 0.148                  | 0.178                  |
| N                                     | 4368                                      | 18885                  | 41951                  | 13730                  | 5938               | 3447               | 24901                  | 19752                  |

\*\*\* 0.01 \*\*0.05 \* 0.1

Note: The regressions include the zip-month fixed effects. The standard errors shown in the parenthesis are clustered at the zip code level.

## School/Education

S28 Table: Effects of initial lockdown and stimulus payments on zip code level school/education spending

|                                       | Dollar Change (\$)    |                       |                       | Percentage Change (%) |                       |                       |
|---------------------------------------|-----------------------|-----------------------|-----------------------|-----------------------|-----------------------|-----------------------|
|                                       | All                   | Republican            | Democratic            | All                   | Republican            | Democratic            |
| $\beta : \mathbb{1}\{\geq 03 - 19\}$  | -32.268***<br>(2.385) | -28.065***<br>(3.411) | -34.929***<br>(3.239) | -60.632***<br>(5.073) | -64.735***<br>(7.670) | -58.036***<br>(6.712) |
| $\gamma : \mathbb{1}\{\geq 04 - 11\}$ | 31.249***<br>(2.730)  | 25.019***<br>(4.061)  | 34.914***<br>(3.614)  | 61.353***<br>(6.578)  | 63.345***<br>(10.515) | 60.181***<br>(8.419)  |
| Adjusted R <sup>2</sup>               | 0.102                 | 0.116                 | 0.095                 | 0.141                 | 0.156                 | 0.131                 |
| N                                     | 260776                | 106597                | 154179                | 260776                | 106597                | 154179                |

\*\*\* 0.01 \*\*0.05 \* 0.1

Note: The regressions include the zip-month fixed effects. The standard errors shown in the parenthesis are clustered at the zip code level.

S29 Table: Effects on school/education dollar change across geographic regions

|                                       | Dependent Variable: Dollar Change (\$) |                       |                       |                       |                       |                    |                       |                      |
|---------------------------------------|----------------------------------------|-----------------------|-----------------------|-----------------------|-----------------------|--------------------|-----------------------|----------------------|
|                                       | New England                            | Midwest               | Southeast             | Great Lakes           | Plains                | Rocky Mountains    | Southwest             | Far West             |
| $\beta : \mathbb{1}\{\geq 03 - 19\}$  | -17.574*<br>(9.860)                    | -30.356***<br>(7.437) | -38.784***<br>(4.323) | -20.429***<br>(5.359) | -24.395**<br>(10.680) | -9.638<br>(9.908)  | -47.597***<br>(5.618) | -13.242**<br>(6.487) |
| $\gamma : \mathbb{1}\{\geq 04 - 11\}$ | 27.225**<br>(12.605)                   | 16.640*<br>(8.844)    | 44.670***<br>(4.810)  | 27.694***<br>(7.392)  | 31.918***<br>(11.013) | -5.174<br>(11.985) | 33.471***<br>(6.571)  | 19.854***<br>(6.939) |
| Adjusted R <sup>2</sup>               | 0.158                                  | 0.110                 | 0.088                 | 0.104                 | 0.108                 | 0.110              | 0.091                 | 0.137                |
| N                                     | 6744                                   | 26688                 | 82028                 | 33575                 | 17244                 | 9133               | 52996                 | 32411                |

\*\*\* 0.01 \*\*0.05 \* 0.1

Note: The regressions include the zip-month fixed effects. The standard errors shown in the parenthesis are clustered at the zip code level.

S30 Table: Effects on school/education percentage change across geographic regions

|                                       | Dependent Variable: Percentage Change (%) |                        |                       |                       |                        |                     |                       |                      |
|---------------------------------------|-------------------------------------------|------------------------|-----------------------|-----------------------|------------------------|---------------------|-----------------------|----------------------|
|                                       | New England                               | Midwest                | Southeast             | Great Lakes           | Plains                 | Rocky Mountains     | Southwest             | Far West             |
| $\beta : \mathbb{1}\{\geq 03 - 19\}$  | -24.995<br>(30.382)                       | -46.464***<br>(16.440) | -73.428***<br>(8.694) | -36.041**<br>(14.605) | -64.295***<br>(22.458) | -32.553<br>(31.724) | -86.310***<br>(9.506) | -28.467*<br>(16.962) |
| $\gamma : \mathbb{1}\{\geq 04 - 11\}$ | 90.817**<br>(41.590)                      | 50.529**<br>(20.377)   | 86.373***<br>(11.046) | 71.720***<br>(19.511) | 82.676***<br>(25.894)  | -29.055<br>(44.441) | 41.400***<br>(13.905) | 32.791*<br>(19.792)  |
| Adjusted R <sup>2</sup>               | 0.168                                     | 0.153                  | 0.130                 | 0.144                 | 0.151                  | 0.140               | 0.120                 | 0.156                |
| N                                     | 6744                                      | 26688                  | 82028                 | 33575                 | 17244                  | 9133                | 52996                 | 32411                |

\*\*\* 0.01 \*\*0.05 \* 0.1

Note: The regressions include the zip-month fixed effects. The standard errors shown in the parenthesis are clustered at the zip code level.

## Child Care

S31 Table: Effects of initial lockdown and stimulus payments on zip code level child care spending

|                                       | Dollar Change (\$)    |                       |                       | Percentage Change (%) |                       |                       |
|---------------------------------------|-----------------------|-----------------------|-----------------------|-----------------------|-----------------------|-----------------------|
|                                       | All                   | Republican            | Democratic            | All                   | Republican            | Democratic            |
| $\beta : \mathbb{1}\{\geq 03 - 19\}$  | -73.643***<br>(5.631) | -43.961***<br>(7.762) | -93.927***<br>(7.619) | -49.375***<br>(4.463) | -31.240***<br>(6.545) | -61.768***<br>(5.950) |
| $\gamma : \mathbb{1}\{\geq 04 - 11\}$ | -10.844<br>(10.357)   | -14.089<br>(14.128)   | -8.485<br>(14.656)    | -2.570<br>(7.465)     | -1.149<br>(12.196)    | -3.603<br>(9.363)     |
| Adjusted R <sup>2</sup>               | 0.166                 | 0.190                 | 0.156                 | 0.205                 | 0.236                 | 0.188                 |
| N                                     | 41476                 | 15461                 | 26015                 | 41476                 | 15461                 | 26015                 |

\*\*\* 0.01 \*\*0.05 \* 0.1

Note: The regressions include the zip-month fixed effects. The standard errors shown in the parenthesis are clustered at the zip code level.

S32 Table: Effects on child care spending change across geographic regions

|                                       | Dependent Variable: Percentage Change (%) |                     |                       |                        |                       |                      |                        |                     |
|---------------------------------------|-------------------------------------------|---------------------|-----------------------|------------------------|-----------------------|----------------------|------------------------|---------------------|
|                                       | New England                               | Mideast             | Southeast             | Great Lakes            | Plains                | Rocky Mountains      | Southwest              | Far West            |
| $\beta : \mathbb{1}\{\geq 03 - 19\}$  | -17.631<br>(97.347)                       | -26.120<br>(25.621) | -76.694***<br>(7.617) | -67.675***<br>(19.693) | -77.330**<br>(36.644) | -37.237<br>(45.899)  | -77.840***<br>(10.181) | -51.276<br>(32.985) |
| $\gamma : \mathbb{1}\{\geq 04 - 11\}$ | 11.090***<br>(0.000)                      | 46.004<br>(31.695)  | -10.975<br>(11.638)   | 85.838**<br>(40.557)   | 23.420<br>(33.988)    | -7.123***<br>(0.000) | -24.760<br>(21.774)    | 4.645<br>(39.843)   |
| Adjusted R <sup>2</sup>               | 0.342                                     | 0.196               | 0.156                 | 0.241                  | 0.222                 | 0.450                | 0.154                  | 0.201               |
| N                                     | 527                                       | 2714                | 19628                 | 2556                   | 1448                  | 228                  | 13150                  | 1225                |

\*\*\* 0.01 \*\*0.05 \* 0.1

Note: The regressions include the zip-month fixed effects. The standard errors shown in the parenthesis are clustered at the zip code level.

S33 Table: Effects on child care percentage change across geographic regions

|                                       | Dependent Variable: Percentage Change (%) |                       |                       |                        |                     |                       |                       |                      |
|---------------------------------------|-------------------------------------------|-----------------------|-----------------------|------------------------|---------------------|-----------------------|-----------------------|----------------------|
|                                       | New England                               | Mideast               | Southeast             | Great Lakes            | Plains              | Rocky Mountains       | Southwest             | Far West             |
| $\beta : \mathbb{1}\{\geq 03 - 19\}$  | 38.217<br>(73.574)                        | -47.777**<br>(19.851) | -43.779***<br>(6.326) | -92.860***<br>(24.847) | -46.869<br>(32.781) | -159.026<br>(102.188) | -51.347***<br>(7.033) | -60.365*<br>(32.272) |
| $\gamma : \mathbb{1}\{\geq 04 - 11\}$ | 6.042***<br>(0.000)                       | 24.798<br>(48.427)    | -8.893<br>(9.027)     | 70.947*<br>(42.610)    | 50.785<br>(48.181)  | -0.760***<br>(0.000)  | -2.874<br>(13.744)    | -33.897<br>(50.865)  |
| Adjusted R <sup>2</sup>               | 0.365                                     | 0.229                 | 0.191                 | 0.276                  | 0.254               | 0.340                 | 0.173                 | 0.225                |
| N                                     | 527                                       | 2714                  | 19628                 | 2556                   | 1448                | 228                   | 13150                 | 1225                 |

\*\*\* 0.01 \*\*0.05 \* 0.1

Note: The regressions include the zip-month fixed effects. The standard errors shown in the parenthesis are clustered at the zip code level.

## .4 Health Spending

### Total

S34 Table: Effects of initial lockdown and stimulus payments on zip code level health spending

|                                       | Dollar Change (\$)    |                       |                       | Percentage Change (%) |                      |                       |
|---------------------------------------|-----------------------|-----------------------|-----------------------|-----------------------|----------------------|-----------------------|
|                                       | All                   | Republican            | Democratic            | All                   | Republican           | Democratic            |
| $\beta : \mathbb{1}\{\geq 03 - 19\}$  | -23.261***<br>(1.295) | -14.858***<br>(1.491) | -33.324***<br>(2.209) | -11.822***<br>(0.636) | -9.802***<br>(0.920) | -14.240***<br>(0.861) |
| $\gamma : \mathbb{1}\{\geq 04 - 11\}$ | 132.333***<br>(2.223) | 96.419***<br>(2.130)  | 173.725***<br>(4.053) | 44.573***<br>(0.824)  | 46.656***<br>(1.197) | 42.172***<br>(1.113)  |
| Adjusted R <sup>2</sup>               | 0.169                 | 0.120                 | 0.196                 | 0.120                 | 0.120                | 0.117                 |
| N                                     | 1471045               | 800112                | 670933                | 1471045               | 800112               | 670933                |

\*\*\* 0.01 \*\*0.05 \* 0.1

Note: The regressions include the zip-month fixed effects. The standard errors shown in the parenthesis are clustered at the zip code level.

S35 Table: Effects on health dollar change across geographic region

|                                       | Dependent Variable: Dollar Change (\$) |                       |                       |                       |                       |                       |                       |                       |
|---------------------------------------|----------------------------------------|-----------------------|-----------------------|-----------------------|-----------------------|-----------------------|-----------------------|-----------------------|
|                                       | New England                            | Mideast               | Southeast             | Great Lakes           | Plains                | Rocky Mountains       | Southwest             | Far West              |
| $\beta : \mathbb{1}\{\geq 03 - 19\}$  | -20.834***<br>(4.398)                  | -28.333***<br>(3.261) | -21.098***<br>(2.350) | -18.806***<br>(3.118) | -3.478<br>(3.721)     | 3.449<br>(6.201)      | -34.530***<br>(4.658) | -38.115***<br>(3.939) |
| $\gamma : \mathbb{1}\{\geq 04 - 11\}$ | 80.393***<br>(6.251)                   | 123.298***<br>(5.642) | 133.160***<br>(3.672) | 166.634***<br>(7.687) | 126.917***<br>(7.882) | 104.880***<br>(9.188) | 162.603***<br>(6.845) | 108.321***<br>(5.718) |
| Adjusted R <sup>2</sup>               | 0.196                                  | 0.223                 | 0.151                 | 0.250                 | 0.139                 | 0.103                 | 0.146                 | 0.092                 |
| N                                     | 78606                                  | 220289                | 447491                | 217978                | 112783                | 46492                 | 175051                | 173444                |

\*\*\* 0.01 \*\*0.05 \* 0.1

Note: The regressions include the zip-month fixed effects. The standard errors shown in the parenthesis are clustered at the zip code level.

S36 Table: Effects on health percentage change across geographic regions

|                                       | Dependent Variable: Percentage Change (%) |                       |                       |                       |                      |                      |                      |                       |
|---------------------------------------|-------------------------------------------|-----------------------|-----------------------|-----------------------|----------------------|----------------------|----------------------|-----------------------|
|                                       | New England                               | Mideast               | Southeast             | Great Lakes           | Plains               | Rocky Mountains      | Southwest            | Far West              |
| $\beta : \mathbb{1}\{\geq 03 - 19\}$  | -8.164**<br>(3.181)                       | -18.510***<br>(1.750) | -12.026***<br>(1.147) | -12.928***<br>(1.694) | -5.080**<br>(2.332)  | 0.184<br>(3.357)     | -9.305***<br>(1.579) | -13.668***<br>(1.802) |
| $\gamma : \mathbb{1}\{\geq 04 - 11\}$ | 29.615***<br>(3.556)                      | 36.430***<br>(2.064)  | 50.202***<br>(1.493)  | 55.209***<br>(2.261)  | 47.226***<br>(3.103) | 39.661***<br>(4.657) | 39.010***<br>(2.292) | 39.802***<br>(2.270)  |
| Adjusted R <sup>2</sup>               | 0.131                                     | 0.113                 | 0.114                 | 0.135                 | 0.120                | 0.124                | 0.119                | 0.107                 |
| N                                     | 78606                                     | 220289                | 447491                | 217978                | 112783               | 46492                | 175051               | 173444                |

\*\*\* 0.01 \*\*0.05 \* 0.1

Note: The regressions include the zip-month fixed effects. The standard errors shown in the parenthesis are clustered at the zip code level.

## Medical Services

S37 Table: Effects of initial lockdown and stimulus payments on zip code level medical services spending

|                                       | Dollar Change (\$)    |                       |                       | Percentage Change (%) |                       |                       |
|---------------------------------------|-----------------------|-----------------------|-----------------------|-----------------------|-----------------------|-----------------------|
|                                       | All                   | Republican            | Democratic            | All                   | Republican            | Democratic            |
| $\beta : \mathbb{1}\{\geq 03 - 19\}$  | -62.229***<br>(2.624) | -45.439***<br>(3.282) | -77.830***<br>(4.002) | -53.095***<br>(2.947) | -49.804***<br>(4.261) | -56.153***<br>(4.078) |
| $\gamma : \mathbb{1}\{\geq 04 - 11\}$ | 53.355***<br>(2.830)  | 45.595***<br>(3.518)  | 60.342***<br>(4.338)  | 56.999***<br>(3.761)  | 55.610***<br>(5.429)  | 58.250***<br>(5.215)  |
| Adjusted R <sup>2</sup>               | 0.101                 | 0.093                 | 0.106                 | 0.127                 | 0.136                 | 0.119                 |
| N                                     | 342838                | 164579                | 178259                | 342838                | 164579                | 178259                |

\*\*\* 0.01 \*\*0.05 \* 0.1

Note: The regressions include the zip-month fixed effects. The standard errors shown in the parenthesis are clustered at the zip code level.

S38 Table: Health medical services spending difference by geographic regions

|                                       | Dependent Variable: Dollar Change (\$) |                       |                       |                       |                       |                        |                       |                       |
|---------------------------------------|----------------------------------------|-----------------------|-----------------------|-----------------------|-----------------------|------------------------|-----------------------|-----------------------|
|                                       | New England                            | Mideast               | Southeast             | Great Lakes           | Plains                | Rocky Mountains        | Southwest             | Far West              |
| $\beta : \mathbb{1}\{\geq 03 - 19\}$  | -45.486***<br>(12.186)                 | -49.971***<br>(7.004) | -62.532***<br>(4.166) | -53.329***<br>(6.714) | -48.465***<br>(8.404) | -49.796***<br>(10.769) | -87.467***<br>(7.216) | -40.838***<br>(7.196) |
| $\gamma : \mathbb{1}\{\geq 04 - 11\}$ | 42.239***<br>(13.698)                  | 39.343***<br>(7.345)  | 60.936***<br>(4.554)  | 50.424***<br>(7.875)  | 53.893***<br>(11.407) | 62.789***<br>(13.079)  | 52.556***<br>(7.357)  | 43.490***<br>(9.019)  |
| Adjusted R <sup>2</sup>               | 0.150                                  | 0.098                 | 0.083                 | 0.094                 | 0.088                 | 0.099                  | 0.118                 | 0.120                 |
| N                                     | 6622                                   | 34109                 | 119895                | 40898                 | 21734                 | 12589                  | 71166                 | 35864                 |

\*\*\* 0.01 \*\*0.05 \* 0.1

Note: The regressions include the zip-month fixed effects. The standard errors shown in the parenthesis are clustered at the zip code level.

S39 Table: Health medical services percentage difference by geographic regions

|                                       | Dependent Variable: Percentage Change (%) |                       |                       |                       |                        |                        |                       |                       |
|---------------------------------------|-------------------------------------------|-----------------------|-----------------------|-----------------------|------------------------|------------------------|-----------------------|-----------------------|
|                                       | New England                               | Mideast               | Southeast             | Great Lakes           | Plains                 | Rocky Mountains        | Southwest             | Far West              |
| $\beta : \mathbb{1}\{\geq 03 - 19\}$  | -46.095*<br>(26.495)                      | -63.773***<br>(9.975) | -54.133***<br>(5.017) | -60.250***<br>(9.243) | -32.981***<br>(12.308) | -44.992***<br>(15.687) | -56.194***<br>(5.546) | -41.508***<br>(9.603) |
| $\gamma : \mathbb{1}\{\geq 04 - 11\}$ | 79.043***<br>(29.434)                     | 58.867***<br>(11.338) | 60.212***<br>(6.441)  | 70.599***<br>(11.012) | 62.848***<br>(13.119)  | 69.702***<br>(18.873)  | 45.641***<br>(8.099)  | 38.755***<br>(12.601) |
| Adjusted R <sup>2</sup>               | 0.196                                     | 0.138                 | 0.120                 | 0.133                 | 0.132                  | 0.120                  | 0.108                 | 0.139                 |
| N                                     | 6622                                      | 34109                 | 119895                | 40898                 | 21734                  | 12589                  | 71166                 | 35864                 |

\*\*\* 0.01 \*\*0.05 \* 0.1

Note: The regressions include the zip-month fixed effects. The standard errors shown in the parenthesis are clustered at the zip code level.



## Drug Stores

S40 Table: Effects of initial lockdown and stimulus payments on zip code level drug stores spending

|                                       | Dollar Change (\$)   |                      |                       | Percentage Change (%) |                      |                      |
|---------------------------------------|----------------------|----------------------|-----------------------|-----------------------|----------------------|----------------------|
|                                       | All                  | Republican           | Democratic            | All                   | Republican           | Democratic           |
| $\beta : \mathbb{1}\{\geq 03 - 19\}$  | -9.908***<br>(0.646) | -3.518***<br>(0.686) | -15.499***<br>(1.045) | -8.224***<br>(0.806)  | -6.394***<br>(1.245) | -9.825***<br>(1.048) |
| $\gamma : \mathbb{1}\{\geq 04 - 11\}$ | 38.363***<br>(0.936) | 23.730***<br>(0.936) | 50.736***<br>(1.513)  | 31.205***<br>(1.050)  | 28.508***<br>(1.639) | 33.486***<br>(1.354) |
| Adjusted R <sup>2</sup>               | 0.150                | 0.117                | 0.162                 | 0.122                 | 0.127                | 0.115                |
| N                                     | 1010485              | 474365               | 536120                | 1010485               | 474365               | 536120               |

\*\*\* 0.01 \*\*0.05 \* 0.1

Note: The regressions include the zip-month fixed effects. The standard errors shown in the parenthesis are clustered at the zip code level.

S41 Table: Effects on drug stores dollar change across geographic regions

|                                       | Dependent Variable: Dollar Change (\$) |                      |                       |                       |                      |                      |                      |                      |
|---------------------------------------|----------------------------------------|----------------------|-----------------------|-----------------------|----------------------|----------------------|----------------------|----------------------|
|                                       | New England                            | Midwest              | Southeast             | Great Lakes           | Plains               | Rocky Mountains      | Southwest            | Far West             |
| $\beta : \mathbb{1}\{\geq 03 - 19\}$  | -15.866***<br>(2.700)                  | -9.460***<br>(1.687) | -10.874***<br>(1.066) | -15.433***<br>(2.219) | -8.283***<br>(2.377) | -3.434<br>(2.779)    | -8.353***<br>(1.816) | -3.332**<br>(1.497)  |
| $\gamma : \mathbb{1}\{\geq 04 - 11\}$ | 37.247***<br>(3.931)                   | 46.269***<br>(2.670) | 27.176***<br>(1.374)  | 57.974***<br>(3.188)  | 39.307***<br>(3.739) | 25.438***<br>(3.895) | 40.568***<br>(2.579) | 33.359***<br>(2.225) |
| Adjusted R <sup>2</sup>               | 0.137                                  | 0.172                | 0.115                 | 0.177                 | 0.113                | 0.080                | 0.184                | 0.121                |
| N                                     | 51366                                  | 147260               | 308623                | 149207                | 64087                | 26302                | 128362               | 135491               |

\*\*\* 0.01 \*\*0.05 \* 0.1

Note: The regressions include the zip-month fixed effects. The standard errors shown in the parenthesis are clustered at the zip code level.

S42 Table: Effects on drug stores percentage change across geographic regions

|                                       | Dependent Variable: Percentage Change (%) |                      |                      |                      |                      |                      |                      |                      |
|---------------------------------------|-------------------------------------------|----------------------|----------------------|----------------------|----------------------|----------------------|----------------------|----------------------|
|                                       | New England                               | Midwest              | Southeast            | Great Lakes          | Plains               | Rocky Mountains      | Southwest            | Far West             |
| $\beta : \mathbb{1}\{\geq 03 - 19\}$  | -19.457***<br>(3.875)                     | -8.285***<br>(2.111) | -9.011***<br>(1.431) | -9.391***<br>(2.207) | -9.020***<br>(3.421) | -6.938<br>(5.706)    | -3.748*<br>(1.930)   | -5.076**<br>(2.251)  |
| $\gamma : \mathbb{1}\{\geq 04 - 11\}$ | 39.985***<br>(4.534)                      | 30.797***<br>(2.714) | 24.757***<br>(1.853) | 40.509***<br>(2.963) | 31.968***<br>(4.344) | 40.565***<br>(7.514) | 29.301***<br>(2.774) | 32.110***<br>(2.753) |
| Adjusted R <sup>2</sup>               | 0.134                                     | 0.122                | 0.120                | 0.136                | 0.114                | 0.097                | 0.123                | 0.098                |
| N                                     | 51366                                     | 147260               | 308623               | 149207               | 64087                | 26302                | 128362               | 135491               |

\*\*\* 0.01 \*\*0.05 \* 0.1

Note: The regressions include the zip-month fixed effects. The standard errors shown in the parenthesis are clustered at the zip code level.

## Liquor Stores and Cigar Stores

S43 Table: Effects of initial lockdown and stimulus payments on zip code level liquor stores and cigar stores spending

|                                       | Dollar Change (\$)   |                      |                      | Percentage Change (%) |                      |                      |
|---------------------------------------|----------------------|----------------------|----------------------|-----------------------|----------------------|----------------------|
|                                       | All                  | Republican           | Democratic           | All                   | Republican           | Democratic           |
| $\beta : \mathbb{1}\{\geq 03 - 19\}$  | 35.067***<br>(0.924) | 22.621***<br>(0.803) | 48.155***<br>(1.676) | 18.136***<br>(0.728)  | 18.476***<br>(1.040) | 17.778***<br>(1.016) |
| $\gamma : \mathbb{1}\{\geq 04 - 11\}$ | 44.528***<br>(1.134) | 27.378***<br>(0.919) | 61.805***<br>(2.050) | 31.996***<br>(0.904)  | 29.667***<br>(1.298) | 34.341***<br>(1.257) |
| Adjusted R <sup>2</sup>               | 0.352                | 0.244                | 0.379                | 0.132                 | 0.131                | 0.134                |
| N                                     | 1096502              | 560205               | 536297               | 1096502               | 560205               | 536297               |

\*\*\* 0.01 \*\*0.05 \* 0.1

Note: The regressions include the zip-month fixed effects. The standard errors shown in the parenthesis are clustered at the zip code level.

S44 Table: Effects on liquor stores and cigar stores dollar change across geographic regions

|                                       | Dependent Variable: Dollar Change (\$) |                      |                      |                      |                      |                      |                      |                      |
|---------------------------------------|----------------------------------------|----------------------|----------------------|----------------------|----------------------|----------------------|----------------------|----------------------|
|                                       | New England                            | Mideast              | Southeast            | Great Lakes          | Plains               | Rocky Mountains      | Southwest            | Far West             |
| $\beta : \mathbb{1}\{\geq 03 - 19\}$  | 26.583***<br>(2.547)                   | 27.531***<br>(3.117) | 44.642***<br>(1.629) | 35.921***<br>(2.842) | 28.171***<br>(2.076) | 42.636***<br>(4.071) | 54.859***<br>(2.428) | 3.677*<br>(1.942)    |
| $\gamma : \mathbb{1}\{\geq 04 - 11\}$ | 30.851***<br>(3.184)                   | 57.852***<br>(3.485) | 36.965***<br>(1.535) | 72.683***<br>(4.693) | 35.298***<br>(2.883) | 17.851***<br>(4.059) | 34.492***<br>(2.399) | 39.126***<br>(2.555) |
| Adjusted R <sup>2</sup>               | 0.384                                  | 0.419                | 0.356                | 0.400                | 0.277                | 0.211                | 0.294                | 0.136                |
| N                                     | 58134                                  | 167013               | 323255               | 161071               | 84868                | 38599                | 133171               | 131179               |

\*\*\* 0.01 \*\*0.05 \* 0.1

Note: The regressions include the zip-month fixed effects. The standard errors shown in the parenthesis are clustered at the zip code level.

S45 Table: Effects on liquor stores and cigar stores percentage change across geographic regions

|                                       | Dependent Variable: Percentage Change (%) |                      |                      |                      |                      |                      |                      |                      |
|---------------------------------------|-------------------------------------------|----------------------|----------------------|----------------------|----------------------|----------------------|----------------------|----------------------|
|                                       | New England                               | Mideast              | Southeast            | Great Lakes          | Plains               | Rocky Mountains      | Southwest            | Far West             |
| $\beta : \mathbb{1}\{\geq 03 - 19\}$  | 16.621***<br>(2.946)                      | 5.209***<br>(1.980)  | 29.551***<br>(1.338) | 9.146***<br>(1.847)  | 16.213***<br>(2.413) | 17.919***<br>(3.393) | 33.206***<br>(2.063) | 2.527<br>(2.068)     |
| $\gamma : \mathbb{1}\{\geq 04 - 11\}$ | 27.048***<br>(3.706)                      | 33.830***<br>(2.187) | 31.393***<br>(1.713) | 40.431***<br>(2.375) | 32.031***<br>(3.191) | 5.898<br>(4.449)     | 28.384***<br>(2.692) | 33.031***<br>(2.597) |
| Adjusted R <sup>2</sup>               | 0.149                                     | 0.130                | 0.126                | 0.151                | 0.143                | 0.141                | 0.122                | 0.119                |
| N                                     | 58134                                     | 167013               | 323255               | 161071               | 84868                | 38599                | 133171               | 131179               |

\*\*\* 0.01 \*\*0.05 \* 0.1

Note: The regressions include the zip-month fixed effects. The standard errors shown in the parenthesis are clustered at the zip code level.

## .5 General Purpose Merchandise Spending

### Total

S46 Table: Effects of initial lockdown and stimulus payments on zip code level general purpose merchandise spending

|                                       | Dollar Change (\$)    |                       |                        | Percentage Change (%) |                      |                      |
|---------------------------------------|-----------------------|-----------------------|------------------------|-----------------------|----------------------|----------------------|
|                                       | All                   | Republican            | Democratic             | All                   | Republican           | Democratic           |
| $\beta : \mathbb{1}\{\geq 03 - 19\}$  | -36.786***<br>(1.730) | -22.770***<br>(1.516) | -60.344***<br>(3.856)  | -8.094***<br>(0.622)  | -7.184***<br>(0.810) | -9.624***<br>(0.963) |
| $\gamma : \mathbb{1}\{\geq 04 - 11\}$ | 296.691***<br>(5.112) | 177.487***<br>(3.330) | 490.613***<br>(11.849) | 67.158***<br>(0.869)  | 62.829***<br>(1.117) | 74.201***<br>(1.375) |
| Adjusted R <sup>2</sup>               | 0.277                 | 0.234                 | 0.294                  | 0.140                 | 0.139                | 0.140                |
| N                                     | 1803147               | 1122319               | 680828                 | 1803147               | 1122319              | 680828               |

\*\*\* 0.01 \*\*0.05 \* 0.1

Note: The regressions include the zip-month fixed effects. The standard errors shown in the parenthesis are clustered at the zip code level.

S47 Table: Effects on general purpose merchandise dollar change across geographic regions

|                                       | Dependent Variable: Dollar Change (\$) |                        |                       |                        |                        |                        |                       |                        |
|---------------------------------------|----------------------------------------|------------------------|-----------------------|------------------------|------------------------|------------------------|-----------------------|------------------------|
|                                       | New England                            | Mideast                | Southeast             | Great Lakes            | Plains                 | Rocky Mountains        | Southwest             | Far West               |
| $\beta : \mathbb{1}\{\geq 03 - 19\}$  | -2.147<br>(8.180)                      | -8.678*<br>(4.753)     | -38.535***<br>(2.714) | -18.518***<br>(4.347)  | -10.467**<br>(5.193)   | -46.693***<br>(7.653)  | -77.077***<br>(5.111) | -79.913***<br>(7.292)  |
| $\gamma : \mathbb{1}\{\geq 04 - 11\}$ | 290.519***<br>(22.495)                 | 369.306***<br>(17.469) | 264.699***<br>(7.080) | 405.927***<br>(18.301) | 211.330***<br>(13.771) | 136.249***<br>(10.542) | 245.401***<br>(9.410) | 292.834***<br>(13.516) |
| Adjusted R <sup>2</sup>               | 0.249                                  | 0.332                  | 0.287                 | 0.354                  | 0.229                  | 0.114                  | 0.229                 | 0.125                  |
| N                                     | 74216                                  | 242200                 | 595244                | 284845                 | 155468                 | 49646                  | 222935                | 179817                 |

\*\*\* 0.01 \*\*0.05 \* 0.1

Note: The regressions include the zip-month fixed effects. The standard errors shown in the parenthesis are clustered at the zip code level.

S48 Table: Effects on general purpose merchandise percentage change across geographic regions

|                                       | Dependent Variable: Percentage Change (%) |                      |                      |                      |                      |                       |                       |                       |
|---------------------------------------|-------------------------------------------|----------------------|----------------------|----------------------|----------------------|-----------------------|-----------------------|-----------------------|
|                                       | New England                               | Mideast              | Southeast            | Great Lakes          | Plains               | Rocky Mountains       | Southwest             | Far West              |
| $\beta : \mathbb{1}\{\geq 03 - 19\}$  | -1.049<br>(3.853)                         | -3.498*<br>(1.856)   | -8.186***<br>(0.998) | -7.638***<br>(1.711) | -1.412<br>(2.162)    | -23.436***<br>(4.192) | -10.775***<br>(1.440) | -15.557***<br>(2.011) |
| $\gamma : \mathbb{1}\{\geq 04 - 11\}$ | 79.350***<br>(4.759)                      | 76.739***<br>(2.419) | 64.445***<br>(1.368) | 84.161***<br>(2.427) | 58.582***<br>(3.229) | 53.813***<br>(5.225)  | 46.338***<br>(2.044)  | 63.550***<br>(2.843)  |
| Adjusted R <sup>2</sup>               | 0.139                                     | 0.129                | 0.139                | 0.149                | 0.122                | 0.112                 | 0.143                 | 0.116                 |
| N                                     | 74216                                     | 242200               | 595244               | 284845               | 155468               | 49646                 | 222935                | 179817                |

\*\*\* 0.01 \*\*0.05 \* 0.1

Note: The regressions include the zip-month fixed effects. The standard errors shown in the parenthesis are clustered at the zip code level.

## Wholesale Clubs

S49 Table: Effects of initial lockdown and stimulus payments on zip code level wholesale clubs spending

|                                       | Dollar Change (\$)   |                      |                      | Percentage Change (%) |                        |                        |
|---------------------------------------|----------------------|----------------------|----------------------|-----------------------|------------------------|------------------------|
|                                       | All                  | Republican           | Democratic           | All                   | Republican             | Democratic             |
| $\beta : \mathbb{1}\{\geq 03 - 19\}$  | 26.638***<br>(2.331) | 19.629***<br>(3.652) | 30.938***<br>(3.018) | 51.534***<br>(7.170)  | 70.515***<br>(11.851)  | 39.891***<br>(8.988)   |
| $\gamma : \mathbb{1}\{\geq 04 - 11\}$ | 73.307***<br>(3.393) | 51.506***<br>(4.666) | 86.007***<br>(4.600) | 125.289***<br>(9.859) | 109.802***<br>(16.720) | 134.310***<br>(12.183) |
| Adjusted R <sup>2</sup>               | 0.189                | 0.171                | 0.196                | 0.131                 | 0.141                  | 0.125                  |
| N                                     | 285230               | 108211               | 177019               | 285230                | 108211                 | 177019                 |

\*\*\* 0.01 \*\*0.05 \* 0.1

Note: The regressions include the zip-month fixed effects. The standard errors shown in the parenthesis are clustered at the zip code level.

S50 Table: Effects on wholesale clubs dollar change across geographic regions

|                                       | Dependent Variable: Spending Change (\$) |                      |                      |                        |                      |                       |                      |                      |
|---------------------------------------|------------------------------------------|----------------------|----------------------|------------------------|----------------------|-----------------------|----------------------|----------------------|
|                                       | New England                              | Midwest              | Southeast            | Great Lakes            | Plains               | Rocky Mountains       | Southwest            | Far West             |
| $\beta : \mathbb{1}\{\geq 03 - 19\}$  | 13.433<br>(10.967)                       | 42.014***<br>(6.943) | 28.177***<br>(4.305) | 26.644***<br>(6.855)   | 30.351***<br>(8.863) | 14.677<br>(12.448)    | 23.408***<br>(5.496) | 20.096***<br>(5.622) |
| $\gamma : \mathbb{1}\{\geq 04 - 11\}$ | 74.622***<br>(13.279)                    | 78.795***<br>(8.759) | 60.630***<br>(6.171) | 130.347***<br>(14.369) | 67.851***<br>(9.752) | 58.032***<br>(14.279) | 60.628***<br>(7.124) | 71.159***<br>(8.270) |
| Adjusted R <sup>2</sup>               | 0.213                                    | 0.178                | 0.184                | 0.173                  | 0.180                | 0.127                 | 0.249                | 0.154                |
| N                                     | 6212                                     | 33107                | 81380                | 32551                  | 19658                | 11087                 | 56683                | 44702                |

\*\*\* 0.01 \*\*0.05 \* 0.1

Note: The regressions include the zip-month fixed effects. The standard errors shown in the parenthesis are clustered at the zip code level.

S51 Table: Effects on wholesale clubs percentage change across geographic regions

|                                       | Dependent Variable: Percentage Change (%) |                        |                        |                        |                      |                    |                       |                        |
|---------------------------------------|-------------------------------------------|------------------------|------------------------|------------------------|----------------------|--------------------|-----------------------|------------------------|
|                                       | New England                               | Midwest                | Southeast              | Great Lakes            | Plains               | Rocky Mountains    | Southwest             | Far West               |
| $\beta : \mathbb{1}\{\geq 03 - 19\}$  | 29.257<br>(46.855)                        | 68.326***<br>(21.034)  | 63.236***<br>(12.938)  | 44.412**<br>(22.017)   | 62.552**<br>(28.392) | 24.569<br>(41.837) | 36.654**<br>(15.018)  | 47.074**<br>(19.462)   |
| $\gamma : \mathbb{1}\{\geq 04 - 11\}$ | 178.867***<br>(46.520)                    | 136.090***<br>(26.671) | 120.229***<br>(19.131) | 192.796***<br>(31.280) | 96.617**<br>(39.607) | 86.108<br>(56.779) | 78.882***<br>(19.678) | 142.038***<br>(25.487) |
| Adjusted R <sup>2</sup>               | 0.172                                     | 0.143                  | 0.133                  | 0.139                  | 0.132                | 0.121              | 0.114                 | 0.121                  |
| N                                     | 6212                                      | 33107                  | 81380                  | 32551                  | 19658                | 11087              | 56683                 | 44702                  |

\*\*\* 0.01 \*\*0.05 \* 0.1

Note: The regressions include the zip-month fixed effects. The standard errors shown in the parenthesis are clustered at the zip code level.

## Discount Stores

S52 Table: Effects of initial lockdown and stimulus payments on zip code level discount stores spending

|                                       | Dollar Change (\$)    |                       |                       | Percentage Change (%) |                      |                      |
|---------------------------------------|-----------------------|-----------------------|-----------------------|-----------------------|----------------------|----------------------|
|                                       | All                   | Republican            | Democratic            | All                   | Republican           | Democratic           |
| $\beta : \mathbb{1}\{\geq 03 - 19\}$  | -13.181***<br>(1.535) | -7.110***<br>(1.244)  | -23.723***<br>(3.598) | -4.755***<br>(0.791)  | -4.162***<br>(1.001) | -5.785***<br>(1.290) |
| $\gamma : \mathbb{1}\{\geq 04 - 11\}$ | 203.109***<br>(3.876) | 121.011***<br>(2.487) | 341.540***<br>(9.159) | 79.296***<br>(1.147)  | 68.249***<br>(1.413) | 97.924***<br>(1.928) |
| Adjusted R <sup>2</sup>               | 0.193                 | 0.174                 | 0.202                 | 0.136                 | 0.136                | 0.136                |
| N                                     | 1476475               | 929384                | 547091                | 1476475               | 929384               | 547091               |

\*\*\* 0.01 \*\*0.05 \* 0.1

Note: The regressions include the zip-month fixed effects. The standard errors shown in the parenthesis are clustered at the zip code level.

S53 Table: Effects on discount stores dollar change across geographic regions

|                                       | Dependent Variable: Dollar Change (\$) |                        |                       |                        |                        |                       |                       |                        |
|---------------------------------------|----------------------------------------|------------------------|-----------------------|------------------------|------------------------|-----------------------|-----------------------|------------------------|
|                                       | New England                            | Mideast                | Southeast             | Great Lakes            | Plains                 | Rocky Mountains       | Southwest             | Far West               |
| $\beta : \mathbb{1}\{\geq 03 - 19\}$  | 21.569**<br>(10.385)                   | 16.170***<br>(4.798)   | -15.025***<br>(1.927) | 14.241***<br>(4.230)   | 2.944<br>(5.501)       | -34.018***<br>(7.084) | -47.826***<br>(3.823) | -62.900***<br>(7.322)  |
| $\gamma : \mathbb{1}\{\geq 04 - 11\}$ | 282.466***<br>(24.385)                 | 282.419***<br>(14.989) | 162.400***<br>(4.584) | 272.062***<br>(13.218) | 147.716***<br>(11.011) | 101.463***<br>(9.249) | 154.720***<br>(6.310) | 228.226***<br>(12.697) |
| Adjusted R <sup>2</sup>               | 0.184                                  | 0.259                  | 0.191                 | 0.233                  | 0.142                  | 0.088                 | 0.192                 | 0.100                  |
| N                                     | 50301                                  | 183572                 | 532169                | 225055                 | 123383                 | 28625                 | 194812                | 139004                 |

\*\*\* 0.01 \*\*0.05 \* 0.1

Note: The regressions include the zip-month fixed effects. The standard errors shown in the parenthesis are clustered at the zip code level.

S54 Table: Effects on discount stores percentage change across geographic regions

|                                       | Dependent Variable: Percentage Change (%) |                      |                      |                       |                      |                       |                       |                       |
|---------------------------------------|-------------------------------------------|----------------------|----------------------|-----------------------|----------------------|-----------------------|-----------------------|-----------------------|
|                                       | New England                               | Mideast              | Southeast            | Great Lakes           | Plains               | Rocky Mountains       | Southwest             | Far West              |
| $\beta : \mathbb{1}\{\geq 03 - 19\}$  | 3.814<br>(5.157)                          | 6.514***<br>(2.469)  | -6.286***<br>(1.214) | 1.174<br>(2.249)      | 4.097<br>(2.804)     | -38.123***<br>(6.305) | -13.170***<br>(1.797) | -15.129***<br>(2.715) |
| $\gamma : \mathbb{1}\{\geq 04 - 11\}$ | 103.096***<br>(6.732)                     | 96.729***<br>(3.400) | 72.006***<br>(1.698) | 105.737***<br>(3.448) | 69.169***<br>(4.030) | 69.461***<br>(9.275)  | 51.499***<br>(2.677)  | 75.015***<br>(3.728)  |
| Adjusted R <sup>2</sup>               | 0.148                                     | 0.131                | 0.131                | 0.145                 | 0.123                | 0.098                 | 0.130                 | 0.110                 |
| N                                     | 50301                                     | 183572               | 532169               | 225055                | 123383               | 28625                 | 194812                | 139004                |

\*\*\* 0.01 \*\*0.05 \* 0.1

Note: The regressions include the zip-month fixed effects. The standard errors shown in the parenthesis are clustered at the zip code level.

## Department Stores

S55 Table: Effects of initial lockdown and stimulus payments on zip code level department stores spending

|                                       | Dollar Change (\$)    |                       |                       | Percentage Change (%) |                       |                       |
|---------------------------------------|-----------------------|-----------------------|-----------------------|-----------------------|-----------------------|-----------------------|
|                                       | All                   | Republican            | Democratic            | All                   | Republican            | Democratic            |
| $\beta : \mathbb{1}\{\geq 03 - 19\}$  | -36.047***<br>(1.283) | -25.160***<br>(1.341) | -46.437***<br>(2.137) | -44.908***<br>(2.070) | -46.349***<br>(3.091) | -43.534***<br>(2.767) |
| $\gamma : \mathbb{1}\{\geq 04 - 11\}$ | 73.054***<br>(1.789)  | 48.362***<br>(1.586)  | 95.353***<br>(3.017)  | 101.423***<br>(2.816) | 99.653***<br>(4.207)  | 103.021***<br>(3.778) |
| Adjusted R <sup>2</sup>               | 0.121                 | 0.104                 | 0.129                 | 0.116                 | 0.122                 | 0.110                 |
| N                                     | 582843                | 284687                | 298156                | 582843                | 284687                | 298156                |

\*\*\* 0.01 \*\*0.05 \* 0.1

Note: The regressions include the zip-month fixed effects. The standard errors shown in the parenthesis are clustered at the zip code level.

S56 Table: Effects on department stores dollar change across geographic regions

|                                       | Dependent Variable: Spending Change (\$) |                       |                       |                       |                       |                       |                       |                       |
|---------------------------------------|------------------------------------------|-----------------------|-----------------------|-----------------------|-----------------------|-----------------------|-----------------------|-----------------------|
|                                       | New England                              | Mideast               | Southeast             | Great Lakes           | Plains                | Rocky Mountains       | Southwest             | Far West              |
| $\beta : \mathbb{1}\{\geq 03 - 19\}$  | -25.884***<br>(6.401)                    | -36.972***<br>(4.172) | -35.334***<br>(2.098) | -45.273***<br>(3.961) | -41.110***<br>(4.293) | -23.336***<br>(4.675) | -40.618***<br>(3.448) | -22.946***<br>(3.082) |
| $\gamma : \mathbb{1}\{\geq 04 - 11\}$ | 63.288***<br>(6.774)                     | 115.386***<br>(6.791) | 61.717***<br>(2.409)  | 116.877***<br>(6.234) | 72.004***<br>(5.857)  | 28.157***<br>(5.585)  | 46.661***<br>(3.800)  | 49.654***<br>(3.673)  |
| Adjusted R <sup>2</sup>               | 0.127                                    | 0.122                 | 0.104                 | 0.117                 | 0.101                 | 0.094                 | 0.167                 | 0.098                 |
| N                                     | 17257                                    | 71616                 | 183800                | 84764                 | 40234                 | 17705                 | 92389                 | 75221                 |

\*\*\* 0.01 \*\*0.05 \* 0.1

Note: The regressions include the zip-month fixed effects. The standard errors shown in the parenthesis are clustered at the zip code level.

S57 Table: Effects on department stores percentage change across geographic regions

|                                       | Dependent Variable: Percentage Change (%) |                       |                       |                       |                       |                        |                       |                       |
|---------------------------------------|-------------------------------------------|-----------------------|-----------------------|-----------------------|-----------------------|------------------------|-----------------------|-----------------------|
|                                       | New England                               | Mideast               | Southeast             | Great Lakes           | Plains                | Rocky Mountains        | Southwest             | Far West              |
| $\beta : \mathbb{1}\{\geq 03 - 19\}$  | -50.088***<br>(12.223)                    | -34.206***<br>(5.797) | -45.005***<br>(3.756) | -49.801***<br>(5.380) | -52.914***<br>(8.239) | -48.218***<br>(11.166) | -48.448***<br>(4.640) | -38.034***<br>(6.264) |
| $\gamma : \mathbb{1}\{\geq 04 - 11\}$ | 121.116***<br>(15.853)                    | 123.227***<br>(7.266) | 101.639***<br>(4.993) | 143.735***<br>(7.718) | 93.868***<br>(10.494) | 52.797***<br>(17.896)  | 75.228***<br>(6.577)  | 69.942***<br>(8.228)  |
| Adjusted R <sup>2</sup>               | 0.139                                     | 0.128                 | 0.111                 | 0.124                 | 0.118                 | 0.112                  | 0.109                 | 0.106                 |
| N                                     | 17257                                     | 71616                 | 183800                | 84764                 | 40234                 | 17705                  | 92389                 | 75221                 |

\*\*\* 0.01 \*\*0.05 \* 0.1

Note: The regressions include the zip-month fixed effects. The standard errors shown in the parenthesis are clustered at the zip code level.

## .6 Food Spending

### Total

S58 Table: Effects of initial lockdown and stimulus payments on zip code level food spending

|                                       | Dollar Change (\$)     |                        |                         | Percentage Change (%) |                       |                       |
|---------------------------------------|------------------------|------------------------|-------------------------|-----------------------|-----------------------|-----------------------|
|                                       | All                    | Republican             | Democratic              | All                   | Republican            | Democratic            |
| $\beta : \mathbb{1}\{\geq 03 - 19\}$  | -414.792***<br>(5.971) | -265.317***<br>(5.578) | -663.623***<br>(12.418) | -21.651***<br>(0.286) | -19.074***<br>(0.389) | -25.941***<br>(0.397) |
| $\gamma : \mathbb{1}\{\geq 04 - 11\}$ | 813.651***<br>(11.677) | 620.880***<br>(10.881) | 1122.352***<br>(24.529) | 38.729***<br>(0.376)  | 42.836***<br>(0.514)  | 32.152***<br>(0.520)  |
| Adjusted R <sup>2</sup>               | 0.249                  | 0.193                  | 0.287                   | 0.162                 | 0.156                 | 0.175                 |
| N                                     | 2250916                | 1399538                | 851378                  | 2250916               | 1399538               | 851378                |

\*\*\* 0.01 \*\*0.05 \* 0.1

Note: The regressions include the zip-month fixed effects. The standard errors shown in the parenthesis are clustered at the zip code level.

S59 Table: Effects on food dollar change across geographic regions

|                                       | Dependent Variable: Dollar Change (\$) |                        |                         |                         |                         |                         |                         |                         |
|---------------------------------------|----------------------------------------|------------------------|-------------------------|-------------------------|-------------------------|-------------------------|-------------------------|-------------------------|
|                                       | New England                            | Mideast                | Southeast               | Great Lakes             | Plains                  | Rocky Mountains         | Southwest               | Far West                |
| $\beta : \mathbb{1}\{\geq 03 - 19\}$  | -215.851***<br>(11.281)                | -228.818***<br>(8.744) | -464.087***<br>(12.677) | -334.420***<br>(12.279) | -204.830***<br>(10.969) | -480.004***<br>(31.936) | -747.475***<br>(26.313) | -554.682***<br>(16.304) |
| $\gamma : \mathbb{1}\{\geq 04 - 11\}$ | 327.764***<br>(22.486)                 | 464.208***<br>(20.538) | 1034.103***<br>(24.348) | 988.375***<br>(37.494)  | 599.097***<br>(29.400)  | 606.805***<br>(42.005)  | 1140.926***<br>(38.011) | 649.679***<br>(27.531)  |
| Adjusted R <sup>2</sup>               | 0.227                                  | 0.378                  | 0.192                   | 0.337                   | 0.209                   | 0.117                   | 0.265                   | 0.220                   |
| N                                     | 122062                                 | 332401                 | 667516                  | 367148                  | 207829                  | 71851                   | 249687                  | 235181                  |

\*\*\* 0.01 \*\*0.05 \* 0.1

Note: The regressions include the zip-month fixed effects. The standard errors shown in the parenthesis are clustered at the zip code level.

S60 Table: Effects on food-related percentage change across geographic regions

|                                       | Dependent Variable: Percentage Change (%) |                       |                       |                       |                       |                       |                       |                       |
|---------------------------------------|-------------------------------------------|-----------------------|-----------------------|-----------------------|-----------------------|-----------------------|-----------------------|-----------------------|
|                                       | New England                               | Mideast               | Southeast             | Great Lakes           | Plains                | Rocky Mountains       | Southwest             | Far West              |
| $\beta : \mathbb{1}\{\geq 03 - 19\}$  | -30.436***<br>(1.416)                     | -23.233***<br>(0.786) | -19.974***<br>(0.512) | -22.646***<br>(0.772) | -17.267***<br>(1.030) | -23.040***<br>(1.481) | -17.918***<br>(0.676) | -25.638***<br>(0.769) |
| $\gamma : \mathbb{1}\{\geq 04 - 11\}$ | 27.601***<br>(1.551)                      | 29.637***<br>(0.926)  | 47.051***<br>(0.678)  | 50.050***<br>(1.029)  | 38.058***<br>(1.457)  | 28.549***<br>(2.277)  | 34.039***<br>(0.925)  | 25.855***<br>(0.933)  |
| Adjusted R <sup>2</sup>               | 0.148                                     | 0.142                 | 0.155                 | 0.182                 | 0.139                 | 0.151                 | 0.158                 | 0.179                 |
| N                                     | 122062                                    | 332401                | 667516                | 367148                | 207829                | 71851                 | 249687                | 235181                |

\*\*\* 0.01 \*\*0.05 \* 0.1

Note: The regressions include the zip-month fixed effects. The standard errors shown in the parenthesis are clustered at the zip code level.

## Restaurants

S61 Table: Effects of initial lockdown and stimulus payments on zip code level restaurants spending

|                                       | Dollar Change (\$)     |                        |                        | Percentage Change (%) |                       |                       |
|---------------------------------------|------------------------|------------------------|------------------------|-----------------------|-----------------------|-----------------------|
|                                       | All                    | Republican             | Democratic             | All                   | Republican            | Democratic            |
| $\beta : \mathbb{1}\{\geq 03 - 19\}$  | -375.228***<br>(4.097) | -229.036***<br>(3.303) | -610.941***<br>(8.613) | -42.387***<br>(0.248) | -38.985***<br>(0.336) | -47.872***<br>(0.346) |
| $\gamma : \mathbb{1}\{\geq 04 - 11\}$ | 211.148***<br>(3.162)  | 142.876***<br>(2.446)  | 317.706***<br>(6.968)  | 26.040***<br>(0.279)  | 27.794***<br>(0.391)  | 23.303***<br>(0.372)  |
| Adjusted R <sup>2</sup>               | 0.395                  | 0.352                  | 0.428                  | 0.198                 | 0.184                 | 0.229                 |
| N                                     | 2145451                | 1318079                | 827372                 | 2145451               | 1318079               | 827372                |

\*\*\* 0.01 \*\*0.05 \* 0.1

Note: The regressions include the zip-month fixed effects. The standard errors shown in the parenthesis are clustered at the zip code level.

S62 Table: Effects on restaurants dollar change across geographic regions

|                                       | Dependent Variable: Dollar Change (\$) |                         |                        |                         |                        |                         |                         |                         |
|---------------------------------------|----------------------------------------|-------------------------|------------------------|-------------------------|------------------------|-------------------------|-------------------------|-------------------------|
|                                       | New England                            | Midwest                 | Southeast              | Great Lakes             | Plains                 | Rocky Mountains         | Southwest               | Far West                |
| $\beta : \mathbb{1}\{\geq 03 - 19\}$  | -238.571***<br>(10.848)                | -326.747***<br>(10.594) | -383.259***<br>(7.840) | -340.413***<br>(10.527) | -220.881***<br>(9.229) | -353.096***<br>(17.898) | -528.180***<br>(14.285) | -505.073***<br>(11.562) |
| $\gamma : \mathbb{1}\{\geq 04 - 11\}$ | 132.075***<br>(8.726)                  | 222.262***<br>(10.145)  | 235.010***<br>(5.620)  | 249.478***<br>(9.685)   | 176.198***<br>(9.604)  | 81.491***<br>(7.651)    | 236.011***<br>(7.874)   | 147.530***<br>(5.788)   |
| Adjusted R <sup>2</sup>               | 0.313                                  | 0.376                   | 0.355                  | 0.468                   | 0.297                  | 0.330                   | 0.424                   | 0.406                   |
| N                                     | 113791                                 | 311442                  | 648672                 | 349024                  | 190904                 | 66147                   | 242005                  | 225598                  |

\*\*\* 0.01 \*\*0.05 \* 0.1

Note: The regressions include the zip-month fixed effects. The standard errors shown in the parenthesis are clustered at the zip code level.

S63 Table: Effects on restaurants percentage change across geographic regions

|                                       | Dependent Variable: Percentage Change (%) |                       |                       |                       |                       |                       |                       |                       |
|---------------------------------------|-------------------------------------------|-----------------------|-----------------------|-----------------------|-----------------------|-----------------------|-----------------------|-----------------------|
|                                       | New England                               | Midwest               | Southeast             | Great Lakes           | Plains                | Rocky Mountains       | Southwest             | Far West              |
| $\beta : \mathbb{1}\{\geq 03 - 19\}$  | -52.051***<br>(1.280)                     | -46.805***<br>(0.718) | -40.720***<br>(0.426) | -44.602***<br>(0.666) | -37.195***<br>(0.893) | -44.932***<br>(1.455) | -33.823***<br>(0.559) | -46.396***<br>(0.658) |
| $\gamma : \mathbb{1}\{\geq 04 - 11\}$ | 21.788***<br>(1.266)                      | 26.290***<br>(0.756)  | 30.014***<br>(0.474)  | 30.717***<br>(0.781)  | 27.549***<br>(1.099)  | 12.118***<br>(1.681)  | 20.755***<br>(0.702)  | 17.117***<br>(0.655)  |
| Adjusted R <sup>2</sup>               | 0.176                                     | 0.174                 | 0.200                 | 0.204                 | 0.162                 | 0.187                 | 0.195                 | 0.233                 |
| N                                     | 113791                                    | 311442                | 648672                | 349024                | 190904                | 66147                 | 242005                | 225598                |

\*\*\* 0.01 \*\*0.05 \* 0.1

Note: The regressions include the zip-month fixed effects. The standard errors shown in the parenthesis are clustered at the zip code level.



## Grocery

S64 Table: Effects of initial lockdown and stimulus payments on zip code level grocery spending

|                                       | Dollar Change (\$)    |                       |                        | Percentage Change (%) |                      |                      |
|---------------------------------------|-----------------------|-----------------------|------------------------|-----------------------|----------------------|----------------------|
|                                       | All                   | Republican            | Democratic             | All                   | Republican           | Democratic           |
| $\beta : \mathbb{1}\{\geq 03 - 19\}$  | -62.824***<br>(4.193) | -55.841***<br>(4.226) | -73.974***<br>(8.546)  | -7.053***<br>(0.476)  | -7.623***<br>(0.646) | -6.142***<br>(0.680) |
| $\gamma : \mathbb{1}\{\geq 04 - 11\}$ | 665.329***<br>(9.968) | 534.676***<br>(9.822) | 865.998***<br>(20.107) | 54.371***<br>(0.655)  | 60.180***<br>(0.885) | 45.449***<br>(0.945) |
| Adjusted R <sup>2</sup>               | 0.216                 | 0.163                 | 0.251                  | 0.139                 | 0.136                | 0.145                |
| N                                     | 2059416               | 1260863               | 798553                 | 2059416               | 1260863              | 798553               |

\*\*\* 0.01 \*\*0.05 \* 0.1

Note: The regressions include the zip-month fixed effects. The standard errors shown in the parenthesis are clustered at the zip code level.

S65 Table: Effects on grocery dollar change across geographic regions

|                                       | Dependent Variable: Dollar Change (\$) |                        |                        |                        |                        |                         |                         |                        |
|---------------------------------------|----------------------------------------|------------------------|------------------------|------------------------|------------------------|-------------------------|-------------------------|------------------------|
|                                       | New England                            | Mideast                | Southeast              | Great Lakes            | Plains                 | Rocky Mountains         | Southwest               | Far West               |
| $\beta : \mathbb{1}\{\geq 03 - 19\}$  | 13.092<br>(9.105)                      | 89.520***<br>(8.335)   | -99.726***<br>(8.215)  | -12.647<br>(10.193)    | -3.326<br>(10.510)     | -173.912***<br>(20.443) | -247.960***<br>(17.124) | -73.808***<br>(9.833)  |
| $\gamma : \mathbb{1}\{\geq 04 - 11\}$ | 230.743***<br>(17.564)                 | 285.615***<br>(13.461) | 857.412***<br>(20.911) | 834.051***<br>(32.050) | 494.061***<br>(24.542) | 574.768***<br>(39.432)  | 952.408***<br>(33.336)  | 535.358***<br>(24.308) |
| Adjusted R <sup>2</sup>               | 0.195                                  | 0.320                  | 0.167                  | 0.276                  | 0.185                  | 0.103                   | 0.257                   | 0.181                  |
| N                                     | 105717                                 | 296317                 | 623611                 | 327075                 | 182889                 | 65955                   | 237772                  | 222697                 |

\*\*\* 0.01 \*\*0.05 \* 0.1

Note: The regressions include the zip-month fixed effects. The standard errors shown in the parenthesis are clustered at the zip code level.

S66 Table: Effects on grocery percentage change across geographic regions

|                                       | Dependent Variable: Percentage Change (%) |                      |                      |                      |                      |                       |                      |                      |
|---------------------------------------|-------------------------------------------|----------------------|----------------------|----------------------|----------------------|-----------------------|----------------------|----------------------|
|                                       | New England                               | Mideast              | Southeast            | Great Lakes          | Plains               | Rocky Mountains       | Southwest            | Far West             |
| $\beta : \mathbb{1}\{\geq 03 - 19\}$  | -7.792***<br>(2.488)                      | 0.483<br>(1.378)     | -8.666***<br>(0.847) | -8.425***<br>(1.272) | -3.902**<br>(1.702)  | -10.927***<br>(2.446) | -9.842***<br>(1.107) | -7.811***<br>(1.299) |
| $\gamma : \mathbb{1}\{\geq 04 - 11\}$ | 37.938***<br>(2.942)                      | 35.235***<br>(1.717) | 66.371***<br>(1.158) | 72.405***<br>(1.783) | 53.670***<br>(2.394) | 45.623***<br>(3.701)  | 48.728***<br>(1.655) | 39.223***<br>(1.713) |
| Adjusted R <sup>2</sup>               | 0.122                                     | 0.120                | 0.131                | 0.153                | 0.134                | 0.146                 | 0.144                | 0.140                |
| N                                     | 105717                                    | 296317               | 623611               | 327075               | 182889               | 65955                 | 237772               | 222697               |

\*\*\* 0.01 \*\*0.05 \* 0.1

Note: The regressions include the zip-month fixed effects. The standard errors shown in the parenthesis are clustered at the zip code level.

## .7 Entertainment Spending

### Total

S67 Table: Effects of initial lockdown and stimulus payments on zip code level entertainment spending

|                                       | Dollar Change (\$)     |                       |                        | Percentage Change (%) |                       |                       |
|---------------------------------------|------------------------|-----------------------|------------------------|-----------------------|-----------------------|-----------------------|
|                                       | All                    | Republican            | Democratic             | All                   | Republican            | Democratic            |
| $\beta : \mathbb{1}\{\geq 03 - 19\}$  | -109.533***<br>(1.843) | -72.870***<br>(1.759) | -161.390***<br>(3.598) | -32.198***<br>(0.718) | -28.593***<br>(1.010) | -37.296***<br>(0.981) |
| $\gamma : \mathbb{1}\{\geq 04 - 11\}$ | 234.709***<br>(3.442)  | 166.371***<br>(2.979) | 327.795***<br>(6.893)  | 72.069***<br>(0.974)  | 76.958***<br>(1.368)  | 65.409***<br>(1.345)  |
| Adjusted R <sup>2</sup>               | 0.288                  | 0.191                 | 0.336                  | 0.134                 | 0.130                 | 0.138                 |
| N                                     | 1706646                | 992200                | 714446                 | 1706646               | 992200                | 714446                |

\*\*\* 0.01 \*\*0.05 \* 0.1

Note: The regressions include the zip-month fixed effects. The standard errors shown in the parenthesis are clustered at the zip code level.

S68 Table: Effects on entertainment dollar change across geographic regions

|                                       | Dependent Variable: Dollar Change (\$) |                        |                        |                        |                        |                        |                        |                        |
|---------------------------------------|----------------------------------------|------------------------|------------------------|------------------------|------------------------|------------------------|------------------------|------------------------|
|                                       | New England                            | Mideast                | Southeast              | Great Lakes            | Plains                 | Rocky Mountain         | Southwest              | Far West               |
| $\beta : \mathbb{1}\{\geq 03 - 19\}$  | -66.682***<br>(5.562)                  | -113.455***<br>(5.472) | -120.933***<br>(3.412) | -100.217***<br>(4.356) | -63.047***<br>(4.366)  | -80.604***<br>(8.401)  | -122.067***<br>(5.198) | -133.735***<br>(6.592) |
| $\gamma : \mathbb{1}\{\geq 04 - 11\}$ | 164.402***<br>(10.646)                 | 283.152***<br>(11.566) | 227.726***<br>(5.636)  | 307.628***<br>(10.927) | 193.065***<br>(10.082) | 152.557***<br>(12.165) | 233.514***<br>(7.950)  | 172.602***<br>(7.292)  |
| Adjusted R <sup>2</sup>               | 0.251                                  | 0.440                  | 0.204                  | 0.316                  | 0.236                  | 0.196                  | 0.275                  | 0.191                  |
| N                                     | 83764                                  | 246437                 | 507455                 | 266826                 | 143960                 | 54664                  | 204676                 | 200585                 |

\*\*\* 0.01 \*\*0.05 \* 0.1

Note: The regressions include the zip-month fixed effects. The standard errors shown in the parenthesis are clustered at the zip code level.

S69 Table: Effects on entertainment percentage change across geographic regions

|                                       | Dependent Variable: Percentage Change (%) |                       |                       |                       |                       |                       |                       |                       |
|---------------------------------------|-------------------------------------------|-----------------------|-----------------------|-----------------------|-----------------------|-----------------------|-----------------------|-----------------------|
|                                       | New England                               | Mideast               | Southeast             | Great Lakes           | Plains                | Rocky Mountains       | Southwest             | Far West              |
| $\beta : \mathbb{1}\{\geq 03 - 19\}$  | -37.682***<br>(3.566)                     | -31.202***<br>(2.110) | -38.529***<br>(1.285) | -27.429***<br>(1.902) | -21.652***<br>(2.608) | -27.285***<br>(4.165) | -24.415***<br>(1.683) | -38.722***<br>(1.927) |
| $\gamma : \mathbb{1}\{\geq 04 - 11\}$ | 70.043***<br>(4.665)                      | 74.203***<br>(2.643)  | 75.035***<br>(1.750)  | 98.654***<br>(2.689)  | 79.044***<br>(3.577)  | 49.461***<br>(5.069)  | 56.286***<br>(2.396)  | 43.291***<br>(2.357)  |
| Adjusted R <sup>2</sup>               | 0.127                                     | 0.141                 | 0.126                 | 0.135                 | 0.123                 | 0.129                 | 0.136                 | 0.126                 |
| N                                     | 83764                                     | 246437                | 507455                | 266826                | 143960                | 54664                 | 204676                | 200585                |

\*\*\* 0.01 \*\*0.05 \* 0.1

Note: The regressions include the zip-month fixed effects. The standard errors shown in the parenthesis are clustered at the zip code level.

## Outdoor Recreational Activities

S70 Table: Effects of initial lockdown and stimulus payments on zip code level outdoor recreational activities spending

|                                       | Spending Change (\$)   |                       |                        | Percentage Change (%) |                       |                       |
|---------------------------------------|------------------------|-----------------------|------------------------|-----------------------|-----------------------|-----------------------|
|                                       | All                    | Republican            | Democratic             | All                   | Republican            | Democratic            |
| $\beta : \mathbb{1}\{\geq 03 - 19\}$  | -110.800***<br>(1.906) | -68.879***<br>(1.705) | -156.947***<br>(3.395) | -88.356***<br>(1.042) | -80.770***<br>(1.556) | -96.707***<br>(1.355) |
| $\gamma : \mathbb{1}\{\geq 04 - 11\}$ | 11.456***<br>(1.187)   | 13.057***<br>(1.384)  | 9.775***<br>(1.952)    | 12.729***<br>(1.273)  | 18.763***<br>(1.970)  | 6.393***<br>(1.585)   |
| Adjusted R <sup>2</sup>               | 0.374                  | 0.127                 | 0.440                  | 0.134                 | 0.133                 | 0.133                 |
| N                                     | 957669                 | 491093                | 466576                 | 957669                | 491093                | 466576                |

\*\*\* 0.01 \*\*0.05 \* 0.1

Note: The regressions include the zip-month fixed effects. The standard errors shown in the parenthesis are clustered at the zip code level.

S71 Table: Effects on outdoor recreational activities dollar change across geographic regions

|                                       | Dependent Variable: Dollar Change (\$) |                        |                        |                        |                       |                        |                        |                        |
|---------------------------------------|----------------------------------------|------------------------|------------------------|------------------------|-----------------------|------------------------|------------------------|------------------------|
|                                       | New England                            | Mideast                | Southeast              | Great Lakes            | Plains                | Rocky Mountain         | Southwest              | Far West               |
| $\beta : \mathbb{1}\{\geq 03 - 19\}$  | -71.767***<br>(5.714)                  | -127.373***<br>(6.062) | -103.404***<br>(3.044) | -107.291***<br>(4.809) | -74.073***<br>(4.990) | -103.851***<br>(8.692) | -118.763***<br>(5.709) | -140.293***<br>(6.161) |
| $\gamma : \mathbb{1}\{\geq 04 - 11\}$ | 8.573<br>(5.312)                       | 1.784<br>(3.771)       | 14.540***<br>(1.937)   | 20.597***<br>(2.878)   | 19.470***<br>(4.258)  | 11.688*<br>(6.249)     | 10.044***<br>(3.077)   | 1.955<br>(3.774)       |
| Adjusted R <sup>2</sup>               | 0.144                                  | 0.659                  | 0.159                  | 0.146                  | 0.141                 | 0.163                  | 0.236                  | 0.239                  |
| N                                     | 35199                                  | 112774                 | 290455                 | 135802                 | 71776                 | 33360                  | 144000                 | 134970                 |

\*\*\* 0.01 \*\*0.05 \* 0.1

Note: The regressions include the zip-month fixed effects. The standard errors shown in the parenthesis are clustered at the zip code level.

S72 Table: Effects on outdoor recreational activities percentage change across geographic regions

|                                       | Dependent Variable: Percentage Change (%) |                       |                       |                       |                       |                       |                       |                       |
|---------------------------------------|-------------------------------------------|-----------------------|-----------------------|-----------------------|-----------------------|-----------------------|-----------------------|-----------------------|
|                                       | New England                               | Mideast               | Southeast             | Great Lakes           | Plains                | Rocky Mountain        | Southwest             | Far West              |
| $\beta : \mathbb{1}\{\geq 03 - 19\}$  | -90.217***<br>(6.093)                     | -94.560***<br>(3.183) | -91.856***<br>(1.915) | -92.619***<br>(2.808) | -75.019***<br>(4.089) | -93.608***<br>(5.556) | -68.453***<br>(2.297) | -99.493***<br>(2.707) |
| $\gamma : \mathbb{1}\{\geq 04 - 11\}$ | 10.504<br>(7.757)                         | 4.793<br>(3.441)      | 16.310***<br>(2.403)  | 16.786***<br>(3.509)  | 22.067***<br>(5.314)  | 7.809<br>(6.615)      | 16.419***<br>(2.995)  | 1.031<br>(2.998)      |
| Adjusted R <sup>2</sup>               | 0.154                                     | 0.142                 | 0.129                 | 0.131                 | 0.127                 | 0.128                 | 0.139                 | 0.128                 |
| N                                     | 35199                                     | 112774                | 290455                | 135802                | 71776                 | 33360                 | 144000                | 134970                |

\*\*\* 0.01 \*\*0.05 \* 0.1

Note: The regressions include the zip-month fixed effects. The standard errors shown in the parenthesis are clustered at the zip code level.

## In-home Digital

S73 Table: Effects of initial lockdown and stimulus payments on zip code level in-home digital spending

|                                       | Dollar Change (\$)   |                      |                      | Percentage Change (%) |                      |                      |
|---------------------------------------|----------------------|----------------------|----------------------|-----------------------|----------------------|----------------------|
|                                       | All                  | Republican           | Democratic           | All                   | Republican           | Democratic           |
| $\beta : \mathbb{1}\{\geq 03 - 19\}$  | 28.612***<br>(0.659) | 21.424***<br>(0.710) | 36.567***<br>(1.132) | 76.780***<br>(2.053)  | 69.672***<br>(2.836) | 84.646***<br>(2.973) |
| $\gamma : \mathbb{1}\{\geq 04 - 11\}$ | 49.302***<br>(1.046) | 38.986***<br>(1.049) | 60.322***<br>(1.833) | 79.104***<br>(2.877)  | 85.013***<br>(3.960) | 72.793***<br>(4.184) |
| Adjusted R <sup>2</sup>               | 0.382                | 0.315                | 0.403                | 0.147                 | 0.143                | 0.152                |
| N                                     | 854505               | 444974               | 409531               | 854505                | 444974               | 409531               |

\*\*\* 0.01 \*\*0.05 \* 0.1

Note: The regressions include the zip-month fixed effects. The standard errors shown in the parenthesis are clustered at the zip code level.

S74 Table: Effects on in-home digital dollar change across geographic regions

|                                       | Dependent Variable: Dollar Change (\$) |                      |                      |                      |                      |                      |                      |                      |
|---------------------------------------|----------------------------------------|----------------------|----------------------|----------------------|----------------------|----------------------|----------------------|----------------------|
|                                       | New England                            | Mideast              | Southeast            | Great Lakes          | Plains               | Rocky Mountain       | Southwest            | Far West             |
| $\beta : \mathbb{1}\{\geq 03 - 19\}$  | 26.275***<br>(2.410)                   | 21.482***<br>(3.319) | 23.277***<br>(0.841) | 32.575***<br>(1.489) | 29.781***<br>(1.903) | 30.683***<br>(2.871) | 36.408***<br>(1.409) | 34.417***<br>(1.672) |
| $\gamma : \mathbb{1}\{\geq 04 - 11\}$ | 37.285***<br>(3.708)                   | 71.779***<br>(4.700) | 42.822***<br>(1.409) | 65.295***<br>(2.655) | 47.434***<br>(3.169) | 42.116***<br>(3.663) | 45.543***<br>(2.037) | 28.731***<br>(1.935) |
| Adjusted R <sup>2</sup>               | 0.400                                  | 0.378                | 0.359                | 0.438                | 0.291                | 0.325                | 0.374                | 0.361                |
| N                                     | 29998                                  | 118529               | 256379               | 130479               | 65832                | 27672                | 123420               | 102717               |

\*\*\* 0.01 \*\*0.05 \* 0.1

Note: The regressions include the zip-month fixed effects. The standard errors shown in the parenthesis are clustered at the zip code level.

S75 Table: Effects on in-home digital percentage change across geographic regions

|                                       | Dependent Variable: Percentage Change (%) |                      |                      |                       |                        |                       |                      |                      |
|---------------------------------------|-------------------------------------------|----------------------|----------------------|-----------------------|------------------------|-----------------------|----------------------|----------------------|
|                                       | New England                               | Mideast              | Southeast            | Great Lakes           | Plains                 | Rocky Mountain        | Southwest            | Far West             |
| $\beta : \mathbb{1}\{\geq 03 - 19\}$  | 79.535***<br>(11.481)                     | 62.974***<br>(6.377) | 68.457***<br>(3.596) | 83.182***<br>(5.274)  | 75.710***<br>(7.180)   | 93.194***<br>(11.237) | 81.972***<br>(4.616) | 93.542***<br>(6.458) |
| $\gamma : \mathbb{1}\{\geq 04 - 11\}$ | 60.509***<br>(15.697)                     | 71.638***<br>(7.890) | 84.366***<br>(5.148) | 113.546***<br>(7.522) | 103.484***<br>(10.289) | 85.223***<br>(14.994) | 72.744***<br>(7.311) | 30.335***<br>(8.208) |
| Adjusted R <sup>2</sup>               | 0.166                                     | 0.195                | 0.131                | 0.152                 | 0.136                  | 0.130                 | 0.129                | 0.132                |
| N                                     | 29998                                     | 118529               | 256379               | 130479                | 65832                  | 27672                 | 123420               | 102717               |

\*\*\* 0.01 \*\*0.05 \* 0.1

Note: The regressions include the zip-month fixed effects. The standard errors shown in the parenthesis are clustered at the zip code level.

## In-home Non-digital

S76 Table: Effects of initial lockdown and stimulus payments on zip code level in-home non-digital spending

|                                       | Dollar Change (\$)    |                       |                       | Percentage Change (%) |                       |                       |
|---------------------------------------|-----------------------|-----------------------|-----------------------|-----------------------|-----------------------|-----------------------|
|                                       | All                   | Republican            | Democratic            | All                   | Republican            | Democratic            |
| $\beta : \mathbb{1}\{\geq 03 - 19\}$  | -58.075***<br>(1.286) | -48.287***<br>(1.413) | -68.533***<br>(2.182) | -36.780***<br>(1.277) | -38.866***<br>(1.835) | -34.553***<br>(1.770) |
| $\gamma : \mathbb{1}\{\geq 04 - 11\}$ | 192.403***<br>(2.831) | 139.761***<br>(2.582) | 246.650***<br>(4.989) | 135.663***<br>(1.783) | 130.363***<br>(2.486) | 141.125***<br>(2.557) |
| Adjusted R <sup>2</sup>               | 0.302                 | 0.218                 | 0.335                 | 0.119                 | 0.122                 | 0.116                 |
| N                                     | 1085064               | 557739                | 527325                | 1085064               | 557739                | 527325                |

\*\*\* 0.01 \*\*0.05 \* 0.1

Note: The regressions include the zip-month fixed effects. The standard errors shown in the parenthesis are clustered at the zip code level.

S77 Table: Effects on in-home non-digital dollar change across geographic regions

|                                       | Dependent Variable: Dollar Change (\$) |                       |                       |                       |                       |                       |                       |                       |
|---------------------------------------|----------------------------------------|-----------------------|-----------------------|-----------------------|-----------------------|-----------------------|-----------------------|-----------------------|
|                                       | New England                            | Mideast               | Southeast             | Great Lakes           | Plains                | Rocky Mountain        | Southwest             | Far West              |
| $\beta : \mathbb{1}\{\geq 03 - 19\}$  | -39.551***<br>(5.059)                  | -65.282***<br>(3.672) | -73.296***<br>(2.464) | -63.783***<br>(3.611) | -42.230***<br>(3.947) | -18.750***<br>(5.244) | -54.163***<br>(3.460) | -39.213***<br>(3.125) |
| $\gamma : \mathbb{1}\{\geq 04 - 11\}$ | 158.402***<br>(10.327)                 | 242.202***<br>(9.941) | 182.634***<br>(4.507) | 260.140***<br>(9.351) | 164.790***<br>(8.371) | 115.148***<br>(9.209) | 188.623***<br>(6.537) | 132.781***<br>(5.283) |
| Adjusted R <sup>2</sup>               | 0.338                                  | 0.374                 | 0.269                 | 0.357                 | 0.283                 | 0.190                 | 0.264                 | 0.238                 |
| N                                     | 47585                                  | 151281                | 318850                | 159794                | 79531                 | 35515                 | 145829                | 147272                |

\*\*\* 0.01 \*\*0.05 \* 0.1

Note: The regressions include the zip-month fixed effects. The standard errors shown in the parenthesis are clustered at the zip code level.

S78 Table: Effects on in-home non-digital percentage change across geographic regions

|                                       | Dependent Variable: Percentage Change (%) |                       |                       |                       |                       |                      |                       |                       |
|---------------------------------------|-------------------------------------------|-----------------------|-----------------------|-----------------------|-----------------------|----------------------|-----------------------|-----------------------|
|                                       | New England                               | Mideast               | Southeast             | Great Lakes           | Plains                | Rocky Mountain       | Southwest             | Far West              |
| $\beta : \mathbb{1}\{\geq 03 - 19\}$  | -35.908***<br>(6.559)                     | -31.495***<br>(3.520) | -49.622***<br>(2.373) | -33.958***<br>(3.500) | -26.130***<br>(4.881) | -13.638*<br>(7.272)  | -31.044***<br>(2.930) | -34.948***<br>(3.407) |
| $\gamma : \mathbb{1}\{\geq 04 - 11\}$ | 152.252***<br>(8.803)                     | 150.221***<br>(4.608) | 133.485***<br>(3.165) | 183.377***<br>(5.146) | 139.433***<br>(6.846) | 79.335***<br>(9.250) | 116.547***<br>(4.614) | 95.254***<br>(4.436)  |
| Adjusted R <sup>2</sup>               | 0.138                                     | 0.133                 | 0.108                 | 0.133                 | 0.117                 | 0.095                | 0.113                 | 0.104                 |
| N                                     | 47585                                     | 151281                | 318850                | 159794                | 79531                 | 35515                | 145829                | 147272                |

\*\*\* 0.01 \*\*0.05 \* 0.1

Note: The regressions include the zip-month fixed effects. The standard errors shown in the parenthesis are clustered at the zip code level.

## .8 Other Non-food Shopping Spending

### Total

S79 Table: Effects of initial lockdown and stimulus payments on zip code level other non-food shopping spending

|                                       | Dollar Change (\$)     |                        |                        | Percentage Change (%) |                       |                       |
|---------------------------------------|------------------------|------------------------|------------------------|-----------------------|-----------------------|-----------------------|
|                                       | All                    | Republican             | Democratic             | All                   | Republican            | Democratic            |
| $\beta : \mathbb{1}\{\geq 03 - 19\}$  | -173.994***<br>(2.817) | -115.334***<br>(2.541) | -275.578***<br>(6.125) | -23.030***<br>(0.286) | -20.193***<br>(0.372) | -27.944***<br>(0.436) |
| $\gamma : \mathbb{1}\{\geq 04 - 11\}$ | 248.597***<br>(3.737)  | 187.981***<br>(3.454)  | 350.571***<br>(8.032)  | 27.530***<br>(0.335)  | 27.891***<br>(0.439)  | 26.922***<br>(0.514)  |
| Adjusted R <sup>2</sup>               | 0.147                  | 0.132                  | 0.160                  | 0.147                 | 0.148                 | 0.147                 |
| N                                     | 2174008                | 1371125                | 802883                 | 2174008               | 1371125               | 802883                |

\*\*\* 0.01 \*\*0.05 \* 0.1

Note: The regressions include the zip-month fixed effects. The standard errors shown in the parenthesis are clustered at the zip code level.

S80 Table: Effects on other non-food shopping dollar change across geographic regions

|                                       | Dependent Variable: Dollar Change (\$) |                        |                        |                        |                        |                         |                         |                        |
|---------------------------------------|----------------------------------------|------------------------|------------------------|------------------------|------------------------|-------------------------|-------------------------|------------------------|
|                                       | New England                            | Midwest                | Southeast              | Great Lakes            | Plains                 | Rocky Mountains         | Southwest               | Far West               |
| $\beta : \mathbb{1}\{\geq 03 - 19\}$  | -95.433***<br>(7.168)                  | -126.214***<br>(5.801) | -168.373***<br>(5.035) | -208.816***<br>(8.200) | -111.444***<br>(6.350) | -158.763***<br>(12.740) | -249.245***<br>(10.677) | -214.127***<br>(8.872) |
| $\gamma : \mathbb{1}\{\geq 04 - 11\}$ | 122.444***<br>(8.426)                  | 140.271***<br>(6.183)  | 305.031***<br>(7.550)  | 268.181***<br>(10.679) | 193.032***<br>(11.436) | 126.641***<br>(14.196)  | 389.154***<br>(13.632)  | 224.251***<br>(9.796)  |
| Adjusted R <sup>2</sup>               | 0.116                                  | 0.115                  | 0.141                  | 0.142                  | 0.123                  | 0.144                   | 0.170                   | 0.175                  |
| N                                     | 108286                                 | 309646                 | 655304                 | 363466                 | 209048                 | 68541                   | 243154                  | 218766                 |

\*\*\* 0.01 \*\*0.05 \* 0.1

Note: The regressions include the zip-month fixed effects. The standard errors shown in the parenthesis are clustered at the zip code level.

S81 Table: Effects on other non-food shopping percentage change across geographic regions

|                                       | Dependent Variable: Percentage Change (%) |                       |                       |                       |                       |                       |                       |                       |
|---------------------------------------|-------------------------------------------|-----------------------|-----------------------|-----------------------|-----------------------|-----------------------|-----------------------|-----------------------|
|                                       | New England                               | Midwest               | Southeast             | Great Lakes           | Plains                | Rocky Mountains       | Southwest             | Far West              |
| $\beta : \mathbb{1}\{\geq 03 - 19\}$  | -28.115***<br>(1.551)                     | -26.893***<br>(0.825) | -20.355***<br>(0.498) | -27.974***<br>(0.713) | -17.858***<br>(0.917) | -23.164***<br>(1.703) | -16.789***<br>(0.724) | -27.437***<br>(0.874) |
| $\gamma : \mathbb{1}\{\geq 04 - 11\}$ | 29.179***<br>(1.756)                      | 25.053***<br>(0.889)  | 31.083***<br>(0.590)  | 29.073***<br>(0.850)  | 23.851***<br>(1.167)  | 19.129***<br>(1.997)  | 26.849***<br>(0.887)  | 23.723***<br>(0.978)  |
| Adjusted R <sup>2</sup>               | 0.140                                     | 0.131                 | 0.144                 | 0.165                 | 0.139                 | 0.146                 | 0.140                 | 0.146                 |
| N                                     | 108286                                    | 309646                | 655304                | 363466                | 209048                | 68541                 | 243154                | 218766                |

\*\*\* 0.01 \*\*0.05 \* 0.1

Note: The regressions include the zip-month fixed effects. The standard errors shown in the parenthesis are clustered at the zip code level.

## Personal Care and Cosmetics

S82 Table: Effects of initial lockdown and stimulus payments on zip code level personal care and cosmetics spending

|                                       | Dollar Change (\$)    |                      |                       | Percentage Change (%) |                       |                       |
|---------------------------------------|-----------------------|----------------------|-----------------------|-----------------------|-----------------------|-----------------------|
|                                       | All                   | Republican           | Democratic            | All                   | Republican            | Democratic            |
| $\beta : \mathbb{1}\{\geq 03 - 19\}$  | -14.319***<br>(1.365) | -5.902***<br>(1.464) | -20.029***<br>(2.050) | -12.938***<br>(1.881) | -10.506***<br>(3.021) | -14.588***<br>(2.400) |
| $\gamma : \mathbb{1}\{\geq 04 - 11\}$ | 55.941***<br>(1.901)  | 37.198***<br>(1.989) | 67.893***<br>(2.800)  | 75.386***<br>(2.693)  | 68.283***<br>(4.308)  | 79.916***<br>(3.445)  |
| Adjusted R <sup>2</sup>               | 0.137                 | 0.133                | 0.139                 | 0.136                 | 0.145                 | 0.130                 |
| N                                     | 318170                | 126574               | 191596                | 318170                | 126574                | 191596                |

\*\*\* 0.01 \*\*0.05 \* 0.1

Note: The regressions include the zip-month fixed effects. The standard errors shown in the parenthesis are clustered at the zip code level.

S83 Table: Effects on personal care and cosmetics dollar change across geographic regions

|                                       | Dependent Variable: Dollar Change (\$) |                       |                       |                       |                      |                      |                       |                      |
|---------------------------------------|----------------------------------------|-----------------------|-----------------------|-----------------------|----------------------|----------------------|-----------------------|----------------------|
|                                       | New England                            | Mideast               | Southeast             | Great Lakes           | Plains               | Rocky Mountains      | Southwest             | Far West             |
| $\beta : \mathbb{1}\{\geq 03 - 19\}$  | -17.461***<br>(6.400)                  | -18.871***<br>(6.361) | -12.014***<br>(2.145) | -16.439***<br>(3.924) | 5.390*<br>(3.037)    | 3.226<br>(5.461)     | -27.281***<br>(3.171) | -4.889*<br>(2.917)   |
| $\gamma : \mathbb{1}\{\geq 04 - 11\}$ | 34.985***<br>(5.878)                   | 62.190***<br>(5.316)  | 69.623***<br>(3.897)  | 61.987***<br>(5.600)  | 47.527***<br>(6.464) | 31.805***<br>(7.217) | 46.058***<br>(3.495)  | 31.449***<br>(3.562) |
| Adjusted R <sup>2</sup>               | 0.160                                  | 0.107                 | 0.142                 | 0.105                 | 0.146                | 0.118                | 0.165                 | 0.134                |
| N                                     | 8204                                   | 36810                 | 109023                | 41322                 | 16827                | 8290                 | 60816                 | 36898                |

\*\*\* 0.01 \*\*0.05 \* 0.1

Note: The regressions include the zip-month fixed effects. The standard errors shown in the parenthesis are clustered at the zip code level.

S84 Table: Effects on personal care and cosmetics percentage change across geographic regions

|                                       | Dependent Variable: Percentage Change (%) |                      |                       |                      |                       |                       |                       |                      |
|---------------------------------------|-------------------------------------------|----------------------|-----------------------|----------------------|-----------------------|-----------------------|-----------------------|----------------------|
|                                       | New England                               | Mideast              | Southeast             | Great Lakes          | Plains                | Rocky Mountains       | Southwest             | Far West             |
| $\beta : \mathbb{1}\{\geq 03 - 19\}$  | -40.387***<br>(11.700)                    | -13.242**<br>(5.362) | -12.497***<br>(3.246) | -10.621*<br>(5.698)  | 5.132<br>(8.067)      | 8.752<br>(11.876)     | -24.371***<br>(3.687) | -4.588<br>(6.061)    |
| $\gamma : \mathbb{1}\{\geq 04 - 11\}$ | 79.715***<br>(16.394)                     | 79.779***<br>(7.160) | 90.009***<br>(4.627)  | 80.200***<br>(7.934) | 85.262***<br>(12.029) | 55.695***<br>(16.870) | 53.920***<br>(5.947)  | 53.684***<br>(7.883) |
| Adjusted R <sup>2</sup>               | 0.149                                     | 0.141                | 0.136                 | 0.128                | 0.149                 | 0.138                 | 0.122                 | 0.143                |
| N                                     | 8204                                      | 36810                | 109023                | 41322                | 16827                 | 8290                  | 60816                 | 36898                |

\*\*\* 0.01 \*\*0.05 \* 0.1

Note: The regressions include the zip-month fixed effects. The standard errors shown in the parenthesis are clustered at the zip code level.

## Auto Dealers

S85 Table: Effects of initial lockdown and stimulus payments on zip code level auto dealers spending

|                              | Dollar Change (\$)     |                        |                        | Percentage Change (%) |                       |                       |
|------------------------------|------------------------|------------------------|------------------------|-----------------------|-----------------------|-----------------------|
|                              | All                    | Republican             | Democratic             | All                   | Republican            | Democratic            |
| $\beta : 1\{\geq 03 - 19\}$  | -148.110***<br>(2.473) | -100.657***<br>(2.273) | -230.318***<br>(5.350) | -21.407***<br>(0.278) | -18.700***<br>(0.363) | -26.096***<br>(0.421) |
| $\gamma : 1\{\geq 04 - 11\}$ | 176.803***<br>(2.830)  | 138.323***<br>(2.747)  | 241.582***<br>(5.952)  | 22.423***<br>(0.321)  | 23.153***<br>(0.422)  | 21.192***<br>(0.486)  |
| Adjusted R <sup>2</sup>      | 0.146                  | 0.132                  | 0.157                  | 0.153                 | 0.151                 | 0.156                 |
| N                            | 2161833                | 1363697                | 798136                 | 2161833               | 1363697               | 798136                |

\*\*\* 0.01 \*\*0.05 \* 0.1

Note: The regressions include the zip-month fixed effects. The standard errors shown in the parenthesis are clustered at the zip code level.

S86 Table: Effects on auto dealers dollar change across geographic regions

|                              | Dependent Variable: Dollar Change (\$) |                       |                        |                        |                       |                         |                        |                        |
|------------------------------|----------------------------------------|-----------------------|------------------------|------------------------|-----------------------|-------------------------|------------------------|------------------------|
|                              | New England                            | Mideast               | Southeast              | Great Lakes            | Plains                | Rocky Mountains         | Southwest              | Far West               |
| $\beta : 1\{\geq 03 - 19\}$  | -75.202***<br>(5.991)                  | -98.484***<br>(5.024) | -150.578***<br>(4.532) | -169.396***<br>(6.849) | -98.843***<br>(5.700) | -130.759***<br>(10.547) | -217.269***<br>(9.556) | -180.625***<br>(7.903) |
| $\gamma : 1\{\geq 04 - 11\}$ | 83.970***<br>(6.175)                   | 100.126***<br>(4.819) | 220.674***<br>(5.762)  | 193.932***<br>(7.821)  | 137.375***<br>(8.596) | 83.286***<br>(11.486)   | 260.245***<br>(10.242) | 161.170***<br>(7.900)  |
| Adjusted R <sup>2</sup>      | 0.122                                  | 0.121                 | 0.139                  | 0.141                  | 0.124                 | 0.153                   | 0.160                  | 0.179                  |
| N                            | 107072                                 | 306815                | 653282                 | 361579                 | 208003                | 68079                   | 242159                 | 217018                 |

\*\*\* 0.01 \*\*0.05 \* 0.1

Note: The regressions include the zip-month fixed effects. The standard errors shown in the parenthesis are clustered at the zip code level.

S87 Table: Effects on auto dealer percentage change across geographic regions

|                              | Dependent Variable: Percentage Change (%) |                       |                       |                       |                       |                       |                       |                       |
|------------------------------|-------------------------------------------|-----------------------|-----------------------|-----------------------|-----------------------|-----------------------|-----------------------|-----------------------|
|                              | New England                               | Mideast               | Southeast             | Great Lakes           | Plains                | Rocky Mountains       | Southwest             | Far West              |
| $\beta : 1\{\geq 03 - 19\}$  | -25.427***<br>(1.477)                     | -24.079***<br>(0.812) | -19.635***<br>(0.481) | -25.409***<br>(0.697) | -16.786***<br>(0.901) | -20.631***<br>(1.646) | -16.254***<br>(0.711) | -25.322***<br>(0.850) |
| $\gamma : 1\{\geq 04 - 11\}$ | 23.311***<br>(1.681)                      | 20.364***<br>(0.847)  | 25.447***<br>(0.566)  | 24.235***<br>(0.806)  | 19.252***<br>(1.105)  | 15.255***<br>(1.938)  | 21.178***<br>(0.866)  | 19.126***<br>(0.941)  |
| Adjusted R <sup>2</sup>      | 0.143                                     | 0.140                 | 0.148                 | 0.169                 | 0.145                 | 0.150                 | 0.143                 | 0.152                 |
| N                            | 107072                                    | 306815                | 653282                | 361579                | 208003                | 68079                 | 242159                | 217018                |

\*\*\* 0.01 \*\*0.05 \* 0.1

Note: The regressions include the zip-month fixed effects. The standard errors shown in the parenthesis are clustered at the zip code level.



## Auto

S88 Table: Effects of initial lockdown and stimulus payments on zip code level auto spending

|                                       | Dollar Change (\$)    |                       |                       | Percentage Change (%) |                       |                       |
|---------------------------------------|-----------------------|-----------------------|-----------------------|-----------------------|-----------------------|-----------------------|
|                                       | All                   | Republican            | Democratic            | All                   | Republican            | Democratic            |
| $\beta : \mathbb{1}\{\geq 03 - 19\}$  | -23.370***<br>(2.249) | -13.467***<br>(2.508) | -32.687***<br>(3.660) | -45.986***<br>(3.532) | -44.462***<br>(5.139) | -47.420***<br>(4.861) |
| $\gamma : \mathbb{1}\{\geq 04 - 11\}$ | 78.466***<br>(2.650)  | 56.444***<br>(3.020)  | 97.968***<br>(4.172)  | 126.917***<br>(5.029) | 126.602***<br>(7.635) | 127.197***<br>(6.648) |
| Adjusted R <sup>2</sup>               | 0.088                 | 0.076                 | 0.093                 | 0.107                 | 0.113                 | 0.100                 |
| N                                     | 501453                | 235157                | 266296                | 501453                | 235157                | 266296                |

\*\*\* 0.01 \*\*0.05 \* 0.1

Note: The regressions include the zip-month fixed effects. The standard errors shown in the parenthesis are clustered at the zip code level.

S89 Table: Effects on auto dollar change across geographic regions

|                                       | Dependent Variable: Spending Change (\$) |                      |                       |                       |                       |                      |                       |                      |
|---------------------------------------|------------------------------------------|----------------------|-----------------------|-----------------------|-----------------------|----------------------|-----------------------|----------------------|
|                                       | New England                              | Mideast              | Southeast             | Great Lakes           | Plains                | Rocky Mountains      | Southwest             | Far West             |
| $\beta : \mathbb{1}\{\geq 03 - 19\}$  | -24.084**<br>(10.312)                    | -19.202**<br>(8.289) | -20.513***<br>(3.294) | -52.417***<br>(8.529) | -12.042<br>(9.075)    | -6.976<br>(8.235)    | -27.953***<br>(5.097) | -4.106<br>(6.214)    |
| $\gamma : \mathbb{1}\{\geq 04 - 11\}$ | 80.684***<br>(11.401)                    | 58.057***<br>(8.058) | 67.664***<br>(3.873)  | 128.889***<br>(9.414) | 89.262***<br>(11.154) | 32.874***<br>(9.470) | 87.335***<br>(6.757)  | 58.448***<br>(6.639) |
| Adjusted R <sup>2</sup>               | 0.087                                    | 0.073                | 0.063                 | 0.067                 | 0.067                 | 0.059                | 0.166                 | 0.090                |
| N                                     | 14529                                    | 43998                | 168476                | 71525                 | 32730                 | 18626                | 94141                 | 57516                |

\*\*\* 0.01 \*\*0.05 \* 0.1

Note: The regressions include the zip-month fixed effects. The standard errors shown in the parenthesis are clustered at the zip code level.

S90 Table: Effects on auto percentage change across geographic regions

|                                       | Dependent Variable: Percentage Change (%) |                        |                       |                        |                        |                     |                        |                        |
|---------------------------------------|-------------------------------------------|------------------------|-----------------------|------------------------|------------------------|---------------------|------------------------|------------------------|
|                                       | New England                               | Mideast                | Southeast             | Great Lakes            | Plains                 | Rocky Mountains     | Southwest              | Far West               |
| $\beta : \mathbb{1}\{\geq 03 - 19\}$  | -81.455***<br>(23.746)                    | -26.440**<br>(13.156)  | -51.635***<br>(5.747) | -48.024***<br>(10.797) | -21.324<br>(13.347)    | -30.355<br>(18.429) | -48.735***<br>(7.219)  | -44.162***<br>(11.641) |
| $\gamma : \mathbb{1}\{\geq 04 - 11\}$ | 189.207***<br>(30.011)                    | 114.608***<br>(15.927) | 102.755***<br>(8.740) | 200.444***<br>(14.036) | 165.923***<br>(18.985) | 15.641<br>(27.618)  | 144.594***<br>(11.108) | 89.341***<br>(14.143)  |
| Adjusted R <sup>2</sup>               | 0.128                                     | 0.129                  | 0.101                 | 0.116                  | 0.107                  | 0.087               | 0.093                  | 0.106                  |
| N                                     | 14529                                     | 43998                  | 168476                | 71525                  | 32730                  | 18626               | 94141                  | 57516                  |

\*\*\* 0.01 \*\*0.05 \* 0.1

Note: The regressions include the zip-month fixed effects. The standard errors shown in the parenthesis are clustered at the zip code level.

## Used Goods and Pawn Stores

S91 Table: Effects of initial lockdown and stimulus payments on zip code level used goods and pawn stores spending

|                                       | Dollar Change (\$)    |                      |                       | Percentage Change (%) |                       |                       |
|---------------------------------------|-----------------------|----------------------|-----------------------|-----------------------|-----------------------|-----------------------|
|                                       | All                   | Republican           | Democratic            | All                   | Republican            | Democratic            |
| $\beta : \mathbb{1}\{\geq 03 - 19\}$  | 10.111***<br>(1.745)  | 8.629***<br>(2.040)  | 11.581***<br>(2.825)  | 12.002***<br>(2.763)  | 12.023***<br>(3.944)  | 11.981***<br>(3.871)  |
| $\gamma : \mathbb{1}\{\geq 04 - 11\}$ | 101.536***<br>(3.155) | 85.649***<br>(3.906) | 115.573***<br>(4.792) | 119.888***<br>(4.660) | 116.071***<br>(6.890) | 123.261***<br>(6.323) |
| Adjusted R <sup>2</sup>               | 0.116                 | 0.107                | 0.122                 | 0.131                 | 0.139                 | 0.124                 |
| N                                     | 378128                | 184384               | 193744                | 378128                | 184384                | 193744                |

\*\*\* 0.01 \*\*0.05 \* 0.1

Note: The regressions include the zip-month fixed effects. The standard errors shown in the parenthesis are clustered at the zip code level.

S92 Table: Effects on used goods and pawn stores dollar change across geographic regions

|                                       | Dependent Variable: Dollar Change (\$) |                      |                       |                      |                      |                       |                       |                      |
|---------------------------------------|----------------------------------------|----------------------|-----------------------|----------------------|----------------------|-----------------------|-----------------------|----------------------|
|                                       | New England                            | Mideast              | Southeast             | Great Lakes          | Plains               | Rocky Mountains       | Southwest             | Far West             |
| $\beta : \mathbb{1}\{\geq 03 - 19\}$  | 5.012<br>(7.275)                       | -10.007**<br>(3.986) | 15.136***<br>(3.068)  | 0.277<br>(3.981)     | 11.877**<br>(4.721)  | 0.181<br>(6.910)      | 15.932***<br>(4.780)  | 7.041**<br>(3.427)   |
| $\gamma : \mathbb{1}\{\geq 04 - 11\}$ | 38.291***<br>(10.770)                  | 31.367***<br>(5.467) | 107.089***<br>(5.500) | 80.481***<br>(7.577) | 89.638***<br>(9.876) | 63.913***<br>(10.321) | 152.035***<br>(7.869) | 72.301***<br>(9.044) |
| Adjusted R <sup>2</sup>               | 0.160                                  | 0.125                | 0.098                 | 0.098                | 0.094                | 0.083                 | 0.160                 | 0.126                |
| N                                     | 9039                                   | 28459                | 119000                | 57899                | 30302                | 17544                 | 70205                 | 45805                |

\*\*\* 0.01 \*\*0.05 \* 0.1

Note: The regressions include the zip-month fixed effects. The standard errors shown in the parenthesis are clustered at the zip code level.

S93 Table: Effects on used goods and pawn stores percentage change across geographic regions

|                                       | Dependent Variable: Percentage Change (%) |                        |                       |                        |                        |                       |                       |                       |
|---------------------------------------|-------------------------------------------|------------------------|-----------------------|------------------------|------------------------|-----------------------|-----------------------|-----------------------|
|                                       | New England                               | Mideast                | Southeast             | Great Lakes            | Plains                 | Rocky Mountains       | Southwest             | Far West              |
| $\beta : \mathbb{1}\{\geq 03 - 19\}$  | -6.555<br>(20.589)                        | -21.937*<br>(11.663)   | 21.189***<br>(4.831)  | -4.934<br>(7.743)      | 9.695<br>(9.957)       | -6.340<br>(11.934)    | 22.948***<br>(5.482)  | 8.660<br>(8.781)      |
| $\gamma : \mathbb{1}\{\geq 04 - 11\}$ | 66.530*<br>(34.838)                       | 101.891***<br>(16.723) | 124.723***<br>(8.093) | 101.032***<br>(12.585) | 116.050***<br>(16.481) | 70.446***<br>(17.929) | 154.232***<br>(9.969) | 92.030***<br>(15.343) |
| Adjusted R <sup>2</sup>               | 0.178                                     | 0.154                  | 0.129                 | 0.131                  | 0.127                  | 0.101                 | 0.124                 | 0.135                 |
| N                                     | 9039                                      | 28459                  | 119000                | 57899                  | 30302                  | 17544                 | 70205                 | 45805                 |

\*\*\* 0.01 \*\*0.05 \* 0.1

Note: The regressions include the zip-month fixed effects. The standard errors shown in the parenthesis are clustered at the zip code level.

## .9 Finance Spending

### Total

S94 Table: Effects of initial lockdown and stimulus payments on zip code level finance spending

|                                       | Dollar Change (\$)      |                        |                          | Percentage Change (%) |                       |                       |
|---------------------------------------|-------------------------|------------------------|--------------------------|-----------------------|-----------------------|-----------------------|
|                                       | All                     | Republican             | Democratic               | All                   | Republican            | Democratic            |
| $\beta : \mathbb{1}\{\geq 03 - 19\}$  | -775.464***<br>(11.316) | -489.050***<br>(9.700) | -1163.787***<br>(22.356) | -38.025***<br>(0.653) | -35.613***<br>(0.931) | -41.296***<br>(0.880) |
| $\gamma : \mathbb{1}\{\geq 04 - 11\}$ | 923.597***<br>(14.358)  | 727.005***<br>(12.820) | 1184.250***<br>(28.497)  | 62.169***<br>(0.855)  | 68.161***<br>(1.224)  | 54.224***<br>(1.138)  |
| Adjusted R <sup>2</sup>               | 0.377                   | 0.323                  | 0.395                    | 0.141                 | 0.135                 | 0.146                 |
| N                                     | 1670577                 | 958054                 | 712523                   | 1670577               | 958054                | 712523                |

\*\*\* 0.01 \*\*0.05 \* 0.1

Note: The regressions include the zip-month fixed effects. The standard errors shown in the parenthesis are clustered at the zip code level.

S95 Table: Effects on finance dollar change across geographic regions

|                                       | Dependent Variable: Spending Change (\$) |                         |                         |                         |                         |                         |                          |                         |
|---------------------------------------|------------------------------------------|-------------------------|-------------------------|-------------------------|-------------------------|-------------------------|--------------------------|-------------------------|
|                                       | New England                              | Mideast                 | Southeast               | Great Lakes             | Plains                  | Rocky Mountains         | Southwest                | Far West                |
| $\beta : \mathbb{1}\{\geq 03 - 19\}$  | -453.322***<br>(31.485)                  | -829.654***<br>(31.526) | -733.128***<br>(20.610) | -778.259***<br>(30.314) | -542.099***<br>(29.191) | -485.186***<br>(36.143) | -1031.536***<br>(36.673) | -908.187***<br>(33.358) |
| $\gamma : \mathbb{1}\{\geq 04 - 11\}$ | 546.890***<br>(36.001)                   | 556.139***<br>(25.078)  | 1182.689***<br>(32.488) | 969.229***<br>(39.842)  | 627.359***<br>(36.734)  | 542.260***<br>(42.889)  | 1296.828***<br>(41.960)  | 791.638***<br>(33.209)  |
| Adjusted R <sup>2</sup>               | 0.328                                    | 0.381                   | 0.352                   | 0.515                   | 0.346                   | 0.320                   | 0.303                    | 0.307                   |
| N                                     | 80507                                    | 247810                  | 516314                  | 250674                  | 131882                  | 49594                   | 202204                   | 192967                  |

\*\*\* 0.01 \*\*0.05 \* 0.1

Note: The regressions include the zip-month fixed effects. The standard errors shown in the parenthesis are clustered at the zip code level.

S96 Table: Effects on finance percentage change across geographic regions

|                                       | Dependent Variable: Percentage Change (%) |                       |                       |                       |                       |                       |                       |                       |
|---------------------------------------|-------------------------------------------|-----------------------|-----------------------|-----------------------|-----------------------|-----------------------|-----------------------|-----------------------|
|                                       | New England                               | Mideast               | Southeast             | Great Lakes           | Plains                | Rocky Mountains       | Southwest             | Far West              |
| $\beta : \mathbb{1}\{\geq 03 - 19\}$  | -37.512***<br>(3.216)                     | -41.497***<br>(1.816) | -35.680***<br>(1.161) | -40.459***<br>(1.895) | -37.292***<br>(2.457) | -36.089***<br>(3.788) | -30.165***<br>(1.424) | -47.015***<br>(1.777) |
| $\gamma : \mathbb{1}\{\geq 04 - 11\}$ | 64.407***<br>(4.201)                      | 45.915***<br>(2.032)  | 74.033***<br>(1.512)  | 76.831***<br>(2.515)  | 51.289***<br>(3.266)  | 45.418***<br>(5.679)  | 57.151***<br>(2.194)  | 49.754***<br>(2.174)  |
| Adjusted R <sup>2</sup>               | 0.132                                     | 0.138                 | 0.135                 | 0.146                 | 0.128                 | 0.121                 | 0.144                 | 0.130                 |
| N                                     | 80507                                     | 247810                | 516314                | 250674                | 131882                | 49594                 | 202204                | 192967                |

\*\*\* 0.01 \*\*0.05 \* 0.1

Note: The regressions include the zip-month fixed effects. The standard errors shown in the parenthesis are clustered at the zip code level.

## Financial Services

S97 Table: Effects of initial lockdown and stimulus payments on zip code level financial services spending

|                                       | Dollar Change (\$)      |                        |                          | Percentage Change (%) |                       |                       |
|---------------------------------------|-------------------------|------------------------|--------------------------|-----------------------|-----------------------|-----------------------|
|                                       | All                     | Republican             | Democratic               | All                   | Republican            | Democratic            |
| $\beta : \mathbb{1}\{\geq 03 - 19\}$  | -760.931***<br>(11.265) | -479.203***<br>(9.686) | -1137.023***<br>(22.095) | -37.312***<br>(0.635) | -35.092***<br>(0.902) | -40.276***<br>(0.867) |
| $\gamma : \mathbb{1}\{\geq 04 - 11\}$ | 904.882***<br>(14.256)  | 711.014***<br>(12.757) | 1157.895***<br>(28.093)  | 61.277***<br>(0.834)  | 67.159***<br>(1.189)  | 53.600***<br>(1.126)  |
| Adjusted R <sup>2</sup>               | 0.381                   | 0.328                  | 0.398                    | 0.141                 | 0.135                 | 0.144                 |
| N                                     | 1627000                 | 926965                 | 700035                   | 1627000               | 926965                | 700035                |

\*\*\* 0.01 \*\*0.05 \* 0.1

Note: The regressions include the zip-month fixed effects. The standard errors shown in the parenthesis are clustered at the zip code level.

S98 Table: Effects on financial services dollar change across geographic regions

|                                       | Dependent Variable: Spending Change (\$) |                         |                         |                         |                         |                         |                          |                         |
|---------------------------------------|------------------------------------------|-------------------------|-------------------------|-------------------------|-------------------------|-------------------------|--------------------------|-------------------------|
|                                       | New England                              | Mideast                 | Southeast               | Great Lakes             | Plains                  | Rocky Mountains         | Southwest                | Far West                |
| $\beta : \mathbb{1}\{\geq 03 - 19\}$  | -446.758***<br>(31.730)                  | -821.922***<br>(31.347) | -712.364***<br>(20.463) | -772.772***<br>(30.321) | -537.574***<br>(29.489) | -463.808***<br>(34.903) | -1010.266***<br>(36.403) | -883.648***<br>(32.922) |
| $\gamma : \mathbb{1}\{\geq 04 - 11\}$ | 531.746***<br>(35.858)                   | 536.492***<br>(24.944)  | 1164.560***<br>(32.122) | 953.741***<br>(39.809)  | 614.599***<br>(36.752)  | 517.216***<br>(41.999)  | 1255.006***<br>(41.255)  | 775.897***<br>(33.015)  |
| Adjusted R <sup>2</sup>               | 0.337                                    | 0.395                   | 0.350                   | 0.521                   | 0.352                   | 0.330                   | 0.307                    | 0.318                   |
| N                                     | 77474                                    | 241118                  | 505430                  | 241644                  | 127273                  | 47872                   | 198656                   | 188826                  |

\*\*\* 0.01 \*\*0.05 \* 0.1

Note: The regressions include the zip-month fixed effects. The standard errors shown in the parenthesis are clustered at the zip code level.

S99 Table: Effects on financial services percentage change across geographic regions

|                                       | Dependent Variable: Percentage Change (%) |                       |                       |                       |                       |                       |                       |                       |
|---------------------------------------|-------------------------------------------|-----------------------|-----------------------|-----------------------|-----------------------|-----------------------|-----------------------|-----------------------|
|                                       | New England                               | Mideast               | Southeast             | Great Lakes           | Plains                | Rocky Mountains       | Southwest             | Far West              |
| $\beta : \mathbb{1}\{\geq 03 - 19\}$  | -34.894***<br>(3.147)                     | -40.654***<br>(1.775) | -34.895***<br>(1.121) | -41.868***<br>(1.818) | -36.721***<br>(2.424) | -32.020***<br>(3.820) | -30.442***<br>(1.406) | -44.345***<br>(1.742) |
| $\gamma : \mathbb{1}\{\geq 04 - 11\}$ | 59.616***<br>(4.023)                      | 42.265***<br>(1.979)  | 74.049***<br>(1.480)  | 78.529***<br>(2.440)  | 50.334***<br>(3.154)  | 48.250***<br>(5.573)  | 55.681***<br>(2.105)  | 48.200***<br>(2.175)  |
| Adjusted R <sup>2</sup>               | 0.133                                     | 0.137                 | 0.134                 | 0.149                 | 0.126                 | 0.115                 | 0.144                 | 0.127                 |
| N                                     | 77474                                     | 241118                | 505430                | 241644                | 127273                | 47872                 | 198656                | 188826                |

\*\*\* 0.01 \*\*0.05 \* 0.1

Note: The regressions include the zip-month fixed effects. The standard errors shown in the parenthesis are clustered at the zip code level.

## Charity

S100 Table: Effects of initial lockdown and stimulus payments on zip code level charity spending

|                                       | Dollar Change (\$)    |                       |                       | Percentage Change (%) |                       |                       |
|---------------------------------------|-----------------------|-----------------------|-----------------------|-----------------------|-----------------------|-----------------------|
|                                       | All                   | Republican            | Democratic            | All                   | Republican            | Democratic            |
| $\beta : \mathbb{1}\{\geq 03 - 19\}$  | -15.932***<br>(1.490) | -15.180***<br>(2.208) | -16.445***<br>(2.003) | -37.775***<br>(3.661) | -39.640***<br>(5.838) | -36.501***<br>(4.698) |
| $\gamma : \mathbb{1}\{\geq 04 - 11\}$ | 21.109***<br>(1.948)  | 16.918***<br>(2.612)  | 23.476***<br>(2.664)  | 49.644***<br>(5.234)  | 49.715***<br>(8.557)  | 49.604***<br>(6.612)  |
| Adjusted R <sup>2</sup>               | 0.143                 | 0.143                 | 0.143                 | 0.149                 | 0.165                 | 0.139                 |
| N                                     | 202561                | 83010                 | 119551                | 202561                | 83010                 | 119551                |

\*\*\* 0.01 \*\*0.05 \* 0.1

Note: The regressions include the zip-month fixed effects. The standard errors shown in the parenthesis are clustered at the zip code level.

S101 Table: Effects on charity dollar change across geographic regions

|                                       | Dependent Variable: Dollar Change (\$) |                       |                       |                       |                       |                       |                       |                      |
|---------------------------------------|----------------------------------------|-----------------------|-----------------------|-----------------------|-----------------------|-----------------------|-----------------------|----------------------|
|                                       | New England                            | Mideast               | Southeast             | Great Lakes           | Plains                | Rocky Mountains       | Southwest             | Far West             |
| $\beta : \mathbb{1}\{\geq 03 - 19\}$  | -4.785<br>(7.425)                      | -26.210***<br>(5.411) | -14.618***<br>(2.460) | -13.318***<br>(4.036) | -21.238***<br>(6.202) | -33.208***<br>(9.866) | -19.114***<br>(3.615) | -6.511*<br>(3.767)   |
| $\gamma : \mathbb{1}\{\geq 04 - 11\}$ | 5.888<br>(8.448)                       | 18.249**<br>(7.116)   | 23.700***<br>(3.340)  | 23.735***<br>(5.270)  | 18.974**<br>(8.830)   | 24.368***<br>(8.074)  | 27.407***<br>(4.835)  | 11.187***<br>(4.240) |
| Adjusted R <sup>2</sup>               | 0.166                                  | 0.121                 | 0.156                 | 0.137                 | 0.137                 | 0.142                 | 0.136                 | 0.146                |
| N                                     | 6381                                   | 19345                 | 66175                 | 27274                 | 11413                 | 5887                  | 36211                 | 29923                |

\*\*\* 0.01 \*\*0.05 \* 0.1

Note: The regressions include the zip-month fixed effects. The standard errors shown in the parenthesis are clustered at the zip code level.

S102 Table: Effects on charity percentage change across geographic regions

|                                       | Dependent Variable: Percentage Change (%) |                        |                       |                        |                       |                        |                       |                       |
|---------------------------------------|-------------------------------------------|------------------------|-----------------------|------------------------|-----------------------|------------------------|-----------------------|-----------------------|
|                                       | New England                               | Mideast                | Southeast             | Great Lakes            | Plains                | Rocky Mountains        | Southwest             | Far West              |
| $\beta : \mathbb{1}\{\geq 03 - 19\}$  | -4.542<br>(23.807)                        | -52.481***<br>(12.215) | -39.951***<br>(6.139) | -42.724***<br>(10.599) | -27.252**<br>(12.944) | -72.490***<br>(20.872) | -35.511***<br>(8.555) | -23.691**<br>(10.203) |
| $\gamma : \mathbb{1}\{\geq 04 - 11\}$ | -7.266<br>(31.535)                        | 33.046**<br>(14.857)   | 62.350***<br>(9.126)  | 48.877***<br>(14.749)  | 61.986***<br>(23.076) | 58.870**<br>(29.501)   | 61.291***<br>(12.973) | 27.746**<br>(13.349)  |
| Adjusted R <sup>2</sup>               | 0.182                                     | 0.164                  | 0.144                 | 0.153                  | 0.169                 | 0.163                  | 0.131                 | 0.153                 |
| N                                     | 6381                                      | 19345                  | 66175                 | 27274                  | 11413                 | 5887                   | 36211                 | 29923                 |

\*\*\* 0.01 \*\*0.05 \* 0.1

Note: The regressions include the zip-month fixed effects. The standard errors shown in the parenthesis are clustered at the zip code level.

## .10 Personal Services

S103 Table: Effects of initial lockdown and stimulus payments on zip code level personal services spending

|                                       | Dollar Change (\$)     |                       |                        | Percentage Change (%) |                       |                       |
|---------------------------------------|------------------------|-----------------------|------------------------|-----------------------|-----------------------|-----------------------|
|                                       | All                    | Republican            | Democratic             | All                   | Republican            | Democratic            |
| $\beta : \mathbb{1}\{\geq 03 - 19\}$  | -130.514***<br>(2.116) | -90.951***<br>(2.194) | -165.939***<br>(3.407) | -73.247***<br>(0.933) | -67.626***<br>(1.463) | -78.279***<br>(1.185) |
| $\gamma : \mathbb{1}\{\geq 04 - 11\}$ | 44.593***<br>(1.697)   | 30.275***<br>(2.030)  | 56.104***<br>(2.572)   | 27.074***<br>(1.113)  | 29.766***<br>(1.809)  | 24.910***<br>(1.383)  |
| Adjusted R <sup>2</sup>               | 0.137                  | 0.108                 | 0.151                  | 0.125                 | 0.129                 | 0.118                 |
| N                                     | 856842                 | 403201                | 453641                 | 856842                | 403201                | 453641                |

\*\*\* 0.01 \*\*0.05 \* 0.1

Note: The regressions include the zip-month fixed effects. The standard errors shown in the parenthesis are clustered at the zip code level.

S104 Table: Effects on personal services dollar change across geographic regions

|                                       | Dependent Variable: Dollar Change (\$) |                        |                        |                        |                       |                        |                        |                        |
|---------------------------------------|----------------------------------------|------------------------|------------------------|------------------------|-----------------------|------------------------|------------------------|------------------------|
|                                       | New England                            | Mideast                | Southeast              | Great Lakes            | Plains                | Rocky Mountains        | Southwest              | Far West               |
| $\beta : \mathbb{1}\{\geq 03 - 19\}$  | -80.938***<br>(6.338)                  | -124.113***<br>(6.117) | -131.467***<br>(3.834) | -144.310***<br>(6.323) | -85.389***<br>(5.778) | -112.084***<br>(8.041) | -176.433***<br>(6.547) | -106.272***<br>(4.154) |
| $\gamma : \mathbb{1}\{\geq 04 - 11\}$ | 32.023***<br>(6.040)                   | 50.791***<br>(5.263)   | 53.588***<br>(2.941)   | 66.949***<br>(5.411)   | 32.537***<br>(5.859)  | -0.350<br>(7.692)      | 28.864***<br>(4.796)   | 31.706***<br>(3.531)   |
| Adjusted R <sup>2</sup>               | 0.116                                  | 0.122                  | 0.126                  | 0.104                  | 0.125                 | 0.120                  | 0.203                  | 0.105                  |
| N                                     | 30800                                  | 106773                 | 268091                 | 118643                 | 57212                 | 28243                  | 127676                 | 119789                 |

\*\*\* 0.01 \*\*0.05 \* 0.1

Note: The regressions include the zip-month fixed effects. The standard errors shown in the parenthesis are clustered at the zip code level.

S105 Table: Effects on personal services percentage change across geographic regions

|                                       | Dependent Variable: Percentage Change (%) |                       |                       |                       |                       |                       |                       |                       |
|---------------------------------------|-------------------------------------------|-----------------------|-----------------------|-----------------------|-----------------------|-----------------------|-----------------------|-----------------------|
|                                       | New England                               | Mideast               | Southeast             | Great Lakes           | Plains                | Rocky Mountains       | Southwest             | Far West              |
| $\beta : \mathbb{1}\{\geq 03 - 19\}$  | -69.170***<br>(5.308)                     | -77.579***<br>(2.704) | -68.128***<br>(1.651) | -80.476***<br>(2.610) | -69.926***<br>(3.701) | -80.875***<br>(5.340) | -67.957***<br>(2.033) | -81.194***<br>(2.692) |
| $\gamma : \mathbb{1}\{\geq 04 - 11\}$ | 14.920**<br>(6.108)                       | 23.741***<br>(3.056)  | 31.024***<br>(1.884)  | 39.737***<br>(3.184)  | 25.567***<br>(4.962)  | 12.299*<br>(7.156)    | 20.174***<br>(2.634)  | 23.223***<br>(2.997)  |
| Adjusted R <sup>2</sup>               | 0.133                                     | 0.134                 | 0.122                 | 0.125                 | 0.121                 | 0.122                 | 0.133                 | 0.106                 |
| N                                     | 30800                                     | 106773                | 268091                | 118643                | 57212                 | 28243                 | 127676                | 119789                |

\*\*\* 0.01 \*\*0.05 \* 0.1

Note: The regressions include the zip-month fixed effects. The standard errors shown in the parenthesis are clustered at the zip code level.

## .11 Clothing and Accessories

S106 Table: Clothing and accessories spending under COVID-19 pandemic

|                                       | Spending Change (\$)   |                        |                         | Percentage Change (%) |                       |                       |
|---------------------------------------|------------------------|------------------------|-------------------------|-----------------------|-----------------------|-----------------------|
|                                       | All                    | Republican             | Democratic              | All                   | Republican            | Democratic            |
| $\beta : \mathbb{1}\{\geq 03 - 19\}$  | -324.618***<br>(6.157) | -177.429***<br>(4.127) | -471.633***<br>(11.146) | -56.691***<br>(0.674) | -53.564***<br>(1.035) | -59.813***<br>(0.863) |
| $\gamma : \mathbb{1}\{\geq 04 - 11\}$ | 261.294***<br>(5.472)  | 157.653***<br>(3.674)  | 360.322***<br>(9.869)   | 68.147***<br>(0.913)  | 72.282***<br>(1.390)  | 64.195***<br>(1.190)  |
| Adjusted R <sup>2</sup>               | 0.186                  | 0.132                  | 0.205                   | 0.138                 | 0.136                 | 0.137                 |
| N                                     | 1015916                | 505099                 | 510817                  | 1015916               | 505099                | 510817                |

\*\*\* 0.01 \*\*0.05 \* 0.1

Note: The regressions use zip-month fixed effects. Standard errors shown in the parenthesis are clustered at zip-code level.

S107 Table: Clothing and accessories spending difference by geographic regions

|                                       | Dependent Variable: Spending Change (\$) |                         |                        |                         |                         |                         |                         |                        |
|---------------------------------------|------------------------------------------|-------------------------|------------------------|-------------------------|-------------------------|-------------------------|-------------------------|------------------------|
|                                       | New England                              | Mideast                 | Southeast              | Great Lakes             | Plains                  | Rocky Mountain          | Southwest               | Far West               |
| $\beta : \mathbb{1}\{\geq 03 - 19\}$  | -252.130***<br>(21.278)                  | -461.892***<br>(24.917) | -304.582***<br>(9.010) | -445.548***<br>(23.317) | -247.786***<br>(19.276) | -138.111***<br>(12.274) | -327.233***<br>(12.278) | -201.671***<br>(9.375) |
| $\gamma : \mathbb{1}\{\geq 04 - 11\}$ | 185.896***<br>(15.832)                   | 403.238***<br>(22.043)  | 254.768***<br>(7.226)  | 423.481***<br>(20.968)  | 221.734***<br>(16.358)  | 78.357***<br>(10.827)   | 142.248***<br>(7.464)   | 133.981***<br>(7.040)  |
| Adjusted R <sup>2</sup>               | 0.178                                    | 0.225                   | 0.160                  | 0.159                   | 0.129                   | 0.120                   | 0.271                   | 0.119                  |
| N                                     | 39656                                    | 138634                  | 332507                 | 141176                  | 68878                   | 29859                   | 139292                  | 126296                 |

\*\*\* 0.01 \*\*0.05 \* 0.1

Note: The regressions use zip-month fixed effects. Standard errors shown in the parenthesis are clustered at zip-code level.

S108 Table: Clothing and accessories percentage difference by geographic regions

|                                       | Dependent Variable: Percentage Change (%) |                       |                       |                       |                       |                       |                       |                       |
|---------------------------------------|-------------------------------------------|-----------------------|-----------------------|-----------------------|-----------------------|-----------------------|-----------------------|-----------------------|
|                                       | New England                               | Mideast               | Southeast             | Great Lakes           | Plains                | Rocky Mountains       | Southwest             | Far West              |
| $\beta : \mathbb{1}\{\geq 03 - 19\}$  | -58.810***<br>(4.041)                     | -57.114***<br>(1.875) | -57.628***<br>(1.156) | -60.383***<br>(1.856) | -55.963***<br>(2.584) | -49.851***<br>(4.246) | -53.467***<br>(1.585) | -54.562***<br>(2.024) |
| $\gamma : \mathbb{1}\{\geq 04 - 11\}$ | 65.343***<br>(4.533)                      | 69.791***<br>(2.209)  | 74.623***<br>(1.568)  | 92.707***<br>(2.647)  | 72.804***<br>(3.516)  | 49.417***<br>(6.016)  | 43.398***<br>(2.203)  | 49.318***<br>(2.629)  |
| Adjusted R <sup>2</sup>               | 0.156                                     | 0.150                 | 0.133                 | 0.142                 | 0.143                 | 0.108                 | 0.145                 | 0.112                 |
| N                                     | 39656                                     | 138634                | 332507                | 141176                | 68878                 | 29859                 | 139292                | 126296                |

\*\*\* 0.01 \*\*0.05 \* 0.1

Note: The regressions use zip-month fixed effects. Standard errors shown in the parenthesis are clustered at zip-code level.
